# Supplementary material for: Association between Polymorphisms in Antioxidant Genes and Inflammatory Bowel Disease
Source: PubMed Central journal article supplement (PMC5215755; doi:10.1371/journal.pone.0169102), 2017-01-04
Supplement: pone.0169102.s002.pdf [file pone.0169102.s002.pdf]

**TABLE S1.** Phenotype categories and number of tests performed for Crohn's disease and ulcerative colitis case-case analysis (according to the clinical characteristics described in Table 1)

| CROHN'S DISEASE |                                  |            | ULCERATIVE COLITIS |                                  |            |
|-----------------|----------------------------------|------------|--------------------|----------------------------------|------------|
| Test            | Phenotype                        | Categories | Test               | Phenotype                        | Categories |
| 1               | Family history of IBD            | no* vs yes | 1                  | Family history of IBD            | no* vs yes |
| 2               | Location                         | L1* vs L2  | 2                  | Location                         | E1* vs E2  |
| 3               | Location                         | L1* vs L3  | 3                  | Location                         | E1* vs E3  |
| 4               | Location                         | L2* vs L3  | 4                  | Location                         | E2* vs E3  |
| 5               | Location (L4)                    | no* vs yes |                    |                                  |            |
| 6               | Behaviour                        | B1* vs B2  |                    |                                  |            |
| 7               | Behaviour                        | B1* vs B3  |                    |                                  |            |
| 8               | Behaviour                        | B2* vs B3  |                    |                                  |            |
| 9               | Behaviour (P)                    | no* vs yes |                    |                                  |            |
| 10              | Rectal involvement               | no* vs yes | 5                  | Rectal involvement               | no* vs yes |
| 11              | Colonic involvement              | no* vs yes | 6                  | Colonic involvement              | no* vs yes |
| 12              | Abdominal surgery                | no* vs yes | 7                  | Abdominal surgery                | no* vs yes |
| 13              | Extraintestinal manifestations   | no* vs yes | 8                  | Extraintestinal manifestations   | no* vs yes |
| 14              | Perianal fistulising disease     | no* vs yes | 9                  | Perianal fistulising disease     | no* vs yes |
| 15              | Previous ongoing corticosteroids | no* vs yes | 10                 | Previous ongoing corticosteroids | no* vs yes |
| 16              | Steroid dependency               | no* vs yes | 11                 | Steroid dependency               | no* vs yes |
| 17              | Steroid resistance               | no* vs yes | 12                 | Steroid resistance               | no* vs yes |
| 18              | Need for immunosuppressant       | no* vs yes | 13                 | Need for immunosuppressant       | no* vs yes |
| 19              | Response to immunosuppressant    | yes* vs no | 14                 | Response to immunosuppressant    | yes* vs no |
| 20              | Response to biologics            | yes* vs no | 15                 | Response to biologics            | yes* vs no |

\*reference category
