# Supplementary material for: Association between Polymorphisms in Antioxidant Genes and Inflammatory Bowel Disease
Source: PubMed Central journal article supplement (PMC5215755; doi:10.1371/journal.pone.0169102), 2017-01-04
Supplement: pone.0169102.s003.pdf [file pone.0169102.s003.pdf]

**TABLE S2.** Characteristics of the SNPs genotyped

| Gene        | SNP ID    | Chromosome position | Gene position | Alleles (major/minor) | MAF Europe* | HWE (p-value)** |
|-------------|-----------|---------------------|---------------|-----------------------|-------------|-----------------|
| <i>GPX1</i> | rs1050450 | 3:49357401          | Exon 2        | G/A                   | 0.34*       | 0.912           |
| <i>SOD2</i> | rs4880    | 6:159692840         | Exon 2        | A/G                   | 0.47*       | 0.074           |

\*data from the 1000 Genomes Project Phase 3

\*\*as measured in this study's control population
