# Supplementary material for: Association between Polymorphisms in Antioxidant Genes and Inflammatory Bowel Disease
Source: PubMed Central journal article supplement (PMC5215755; doi:10.1371/journal.pone.0169102), 2017-01-04
Supplement: pone.0169102.s004.pdf [file pone.0169102.s004.pdf]

**TABLE S3.** TaqMan SNP genotyping assay details.

| Gene        | SNP ID     | Forward primer     | Reverse primer        |
|-------------|------------|--------------------|-----------------------|
| <i>GPX1</i> | rs1050450* | CACTGCAACTGCCAAGCA | CAGACCATTGACATCGAGCCT |
| <i>SOD2</i> | rs4880     | Not available**    | Not available**       |

\*Custom design genotyping assay

\*\*ThermoFisher Scientific does not provide primer sequences for SNP TaqMan assays available on their database
