# Supplementary material for: Association between Polymorphisms in Antioxidant Genes and Inflammatory Bowel Disease
Source: PubMed Central journal article supplement (PMC5215755; doi:10.1371/journal.pone.0169102), 2017-01-04
Supplement: pone.0169102.s005.pdf [file pone.0169102.s005.pdf]

**TABLE S4.** Summary of genotypic frequencies of SNPs in, *SOD2*, and *GPX1* [n (%)] in the Crohn's disease group. Cases are subdivided according to location, rectal involvement, colonic involvement and response to biologics.

| SNP Genotype | Location      |              |               | Rectal involvement |              | Colonic Involvement |               | Responds to biologics |              |
|--------------|---------------|--------------|---------------|--------------------|--------------|---------------------|---------------|-----------------------|--------------|
|              | L1            | L2           | L3            | No                 | Yes          | No                  | Yes           | Yes                   | No           |
| <b>SOD2</b>  | <i>n</i> =195 | <i>n</i> =59 | <i>n</i> =179 | <i>n</i> =336      | <i>n</i> =99 | <i>n</i> =207       | <i>n</i> =228 | <i>n</i> =198         | <i>n</i> =41 |
| <b>AA</b>    | 66<br>(33.8)  | 17<br>(28.8) | 59<br>(33.0)  | 116<br>(34.5)      | 26<br>(26.3) | 69<br>(33.3)        | 73<br>(32.0)  | 61<br>(30.8)          | 10<br>(24.4) |
| <b>GA</b>    | 102<br>(52.3) | 28<br>(47.5) | 83<br>(46.4)  | 166<br>(46.4)      | 48<br>(48.5) | 110<br>(53.1)       | 104<br>(45.6) | 95<br>(48.0)          | 24<br>(58.5) |
| <b>GG</b>    | 27<br>(13.8)  | 14<br>(23.7) | 37<br>(20.7)  | 54<br>(16.1)       | 25<br>(25.3) | 28<br>(13.5)        | 51<br>(22.4)  | 42<br>(21.2)          | 7 (17.1)     |
| <b>GPX1</b>  | <i>n</i> =193 | <i>n</i> =59 | <i>n</i> =176 | <i>n</i> =332      | <i>n</i> =98 | <i>n</i> =205       | <i>n</i> =225 | <i>n</i> =196         | <i>n</i> =41 |
| <b>GG</b>    | 89<br>(46.1)  | 35<br>(59.3) | 67<br>(38.1)  | 147<br>(44.3)      | 44<br>(44.9) | 87<br>(42.4)        | 104<br>(46.2) | 88<br>(44.9)          | 12<br>(29.3) |
| <b>GA</b>    | 79<br>(40.9)  | 18<br>(30.5) | 89<br>(50.6)  | 141<br>(42.5)      | 46<br>(46.9) | 88<br>(42.9)        | 99<br>(44.0)  | 88<br>(44.9)          | 21<br>(51.2) |
| <b>AA</b>    | 25<br>(13.0)  | 6<br>(10.2)  | 20<br>(11.4)  | 44<br>(13.3)       | 8 (8.2)      | 30<br>(14.6)        | 22 (9.8)      | 20<br>(10.2)          | 8 (19.5)     |
