# Supplementary material for: Association between Polymorphisms in Antioxidant Genes and Inflammatory Bowel Disease
Source: PubMed Central journal article supplement (PMC5215755; doi:10.1371/journal.pone.0169102), 2017-01-04
Supplement: pone.0169102.s006.pdf [file pone.0169102.s006.pdf]

**TABLE S5.** Summary of genotypic frequencies of SNPs in, *SOD2*, and *GPX1* [n (%)] in the ulcerative colitis group. Cases are subdivided according to 'location'.

| SNP Genotype       | Location      |               |               |
|--------------------|---------------|---------------|---------------|
|                    | E1            | E2            | E3            |
| <b><i>SOD2</i></b> | <i>n</i> =134 | <i>n</i> =101 | <i>n</i> =129 |
| <b>AA</b>          | 33 (24.6)     | 32 (31.7)     | 36 (27.9)     |
| <b>GA</b>          | 63 (47.0)     | 52 (51.5)     | 69 (53.5)     |
| <b>GG</b>          | 38 (28.4)     | 17 (16.8)     | 24 (18.6)     |
| <b><i>GPX1</i></b> | <i>n</i> =134 | <i>n</i> =101 | <i>n</i> =129 |
| <b>GG</b>          | 50 (37.3)     | 44 (43.6)     | 51 (39.5)     |
| <b>GA</b>          | 60 (44.8)     | 42 (41.6)     | 60 (46.5)     |
| <b>AA</b>          | 24 (17.9)     | 15 (14.9)     | 18 (14.0)     |
