# Supplementary material for: Association between Polymorphisms in Antioxidant Genes and Inflammatory Bowel Disease
Source: PLoS One. 2017 Jan 4;12(1):e0169102. doi: 10.1371/journal.pone.0169102 (PMC5215755; doi:10.1371/journal.pone.0169102)
Supplement: S1 File — (XLSX) [file pone.0169102.s001.xlsx]

## Sheet: Ulcerative colitis study
participant number	disease	sex	age at diagnosis	age at diagnosis (categories)	smoking habits	family history of IBD	rectal involvement	colonic involvement	extraintestinal manifestations	need for immunosuppressant	response to immunosuppressant	previous ongoing corticosteroids	steroid dependency	steroid resistance	abdominal surgery	response to biologics	location	rs4880	rs1050450
3	ulcerative colitis	male	15	A1		no	no	yes	no	yes	yes	yes	no	no	no		E2	GA	GG
6	ulcerative colitis	male	32	A2		no	yes	yes	no	yes	yes	yes	no	no	no	no	E3	GA	GG
7	ulcerative colitis	female	14	A1	former	no	yes	yes	no	yes	yes	yes	no	yes	no		E2	GA	GG
8	ulcerative colitis	female	18	A2	never	no	yes	yes	no	no		yes	no	no	no		E1	GA	GA
24	ulcerative colitis	female	42	A3	never	no	yes	yes	no	yes	no	yes	no	no	yes	no	E1	GG	GA
25	ulcerative colitis	male	26	A2	never	no	yes	yes	no	yes	yes	no	yes	no	no		E1	GA	GA
33	ulcerative colitis	male	52	A3	former	no	yes	yes	yes	no		yes	no	no	no		E3	GA	GG
34	ulcerative colitis	female	56	A3	never	no	yes	yes	no	no		no	no	no	no		E3	GA	GG
37	ulcerative colitis	male	58	A3	never	no	yes	yes	no	no		yes	no	no	no		E3	AA	GA
38	ulcerative colitis	male	43	A3	former	no	yes		no	yes		yes	yes	no		yes	E3	AA	AA
44	ulcerative colitis	male	34	A2	former	no	no	yes	no	yes	yes	yes	yes	no	no		E3	AA	GA
54	ulcerative colitis	male	15	A1	never	no	yes	yes	no	yes	yes	yes	no	yes	no	no	E3	GA	GA
59	ulcerative colitis	male	69	A3	never	no	yes	yes	no	yes	yes	yes	yes	no	no		E2	GG	GA
60	ulcerative colitis	female	50	A3	former	no	yes	yes	no	yes	yes	yes	yes	no	no	no	E2	GG	GA
62	ulcerative colitis	male	53	A3	former	no	yes	yes	no	no		yes	no	no	no		E2	GA	GA
64	ulcerative colitis	female	35	A2	never	yes	yes	yes	yes	no		yes	no	no	no		E2	AA	GG
67	ulcerative colitis	female	24	A2	former	yes	yes	yes	no	yes	no	yes	yes	no	no	no	E3	GA	GG
76	ulcerative colitis	male	28	A2		no	yes	yes	no	yes	no	yes	no	no	yes	no	E1	AA	GA
89	ulcerative colitis	female	28	A2	never	no	yes	yes	no	no		no	no	no	no		E1	GG	GA
94	ulcerative colitis	female	44	A3	never	no	yes	yes	no	no		yes	no	no	no		E1	GA	AA
96	ulcerative colitis	male	40	A2	never	no	yes	yes	no	yes	no	yes	no	no	no	yes	E2	GA	GA
98	ulcerative colitis	female	32	A2	never	no	yes	yes	no	yes	yes	yes	yes	no	no	yes	E3	GG	GA
101	ulcerative colitis	female	47	A3	never	no	yes	yes	yes	yes	yes	yes	yes	no	no		E2	AA	GA
105	ulcerative colitis	male	59	A3	current	no	yes	yes	no	no		yes	yes	no	no		E2	GG	GA
107	ulcerative colitis	male	40	A2	current	no	yes	yes	no	no	no	yes	yes	no	no		E3	AA	GG
110	ulcerative colitis	male	19	A2	never	no	yes	yes	no	yes	yes	yes	yes	no	no		E3	GA	AA
113	ulcerative colitis	female	36	A2	never	no	yes	yes	no	yes	yes	yes	no	no	no		E3	AA	AA
114	ulcerative colitis	female	51	A3	never	no	no	yes	no	no		yes	yes	no	yes		E3	GG	GA
116	ulcerative colitis	female	40	A2	never	no	yes	yes	no	no		yes	no	no	no		E1	AA	GA
119	ulcerative colitis	male	65	A3	former	no	yes	yes	no	no		no	no	no	no		E3	GA	GG
120	ulcerative colitis	male	35	A2	never	no	yes	yes	no	no		yes	no	no	no		E2	GA	GA
121	ulcerative colitis	female	40	A2	never	yes	yes	yes	no	yes	no	yes	yes	no	no	yes	E3	GA	GA
125	ulcerative colitis	female	28	A2	never	no	yes	yes	no	yes	yes	yes	no	no	no		E1	GA	GA
138	ulcerative colitis	female	49	A3	never	no	yes	yes	no	yes	yes	yes	yes	no	no		E3	AA	GG
146	ulcerative colitis	male	19	A2	never	no	yes	yes	no	yes	no	yes	no	no	no	no	E2	GA	AA
150	ulcerative colitis	female	28	A2	never	no	yes	yes	no	yes	no	yes	yes	no	no	yes	E3	AA	GA
159	ulcerative colitis	male	52	A3	former	no	yes	yes	no	no		yes	yes	no	no		E3	GA	GA
160	ulcerative colitis	male	37	A2	current	no	no	yes	no	no		yes	no	no	no		E3	GG	AA
162	ulcerative colitis	female	46	A3		no	yes	yes	no	no		yes	no	no	no		E1	GG	AA
163	ulcerative colitis	female	38	A2	current	no	yes	no	no	no		no	no	no	no		E1	GG	GG
164	ulcerative colitis	male	47	A3	former	no	yes	yes	no	no		yes	no	no	no		E3	GA	GG
166	ulcerative colitis	female	24	A2	former	no	yes	yes	no	yes	no	yes	yes	no	no	yes	E3	GA	GA
171	ulcerative colitis	male	60	A3	former	no	yes	yes	no	yes		yes	no	no	no		E1	GA	GA
176	ulcerative colitis	male	28	A2	never	no	yes	yes	no	yes	no	yes	yes	no	no	yes	E1	GA	AA
178	ulcerative colitis	female	25	A2	former	no	yes	yes	no	yes	no	yes	no	no	no	yes	E3	GA	GG
183	ulcerative colitis	male	20	A2	never	no	yes	yes	no	yes	no	yes	yes	no	no	yes	E2	GA	GG
184	ulcerative colitis	male	28	A2	never	no	yes	yes	no	yes	yes	yes	no	no	no		E3	GA	GG
187	ulcerative colitis	male	25	A2	never	no	yes	yes	no	yes	no	yes	no	yes	yes	no	E3	AA	GA
189	ulcerative colitis	male	32	A2	former	no	yes	yes	no	yes	no	yes	yes	no	no	yes	E2	AA	GA
190	ulcerative colitis	male	45	A3	never	no	yes	yes	no	yes	no	yes	yes	no	no	yes	E3	GA	AA
193	ulcerative colitis	male	21	A2	never	no	yes	yes	no	yes	no	yes	yes	no	no	no	E3	AA	GG
198	ulcerative colitis	female	29	A2	former	no	yes	yes	no	yes	no	yes	no	yes	no	yes	E3	GG	GG
200	ulcerative colitis	female	12	A1	former	no	yes	yes	yes	yes	no	yes	yes	no	no	yes	E3	GA	GG
201	ulcerative colitis	male	37	A2	former		yes	no	no	no		no	no	no	no		E1	GG	GA
204	ulcerative colitis	female	56	A3	never	no	yes	yes	no	yes	no	yes	no	no	no	yes	E1	AA	AA
207	ulcerative colitis	female	33	A2	never	no	yes	yes	no	yes	yes	yes	no	no	no		E1	AA	GA
211	ulcerative colitis	male	22	A2	never	no	yes	yes	no	yes	no	yes	no	yes	no	no	E2	GA	GA
214	ulcerative colitis	male	40	A2	never		yes	yes	no	yes	no	yes	yes	no	no	yes	E2	AA	GA
215	ulcerative colitis	male	36	A2	never	no	yes	yes	no	no	no	yes	no	no	no	yes	E2	AA	GG
220	ulcerative colitis	female	29	A2	never	no	yes	no	no	no		yes	no	no	no	no	E1	GA	GA
223	ulcerative colitis	female	18	A2	never	no	yes	yes	no	yes	no	yes	yes	no	no	no	E3	GG	GA
225	ulcerative colitis	female	21	A2	never	no	yes	yes	no	yes	yes	yes	no	no	no		E1	GA	GA
227	ulcerative colitis	female	25	A2	never	no	yes	yes	no	no	no	yes	yes	no	no		E2	AA	AA
251	ulcerative colitis	male	60	A3	never	no	yes	yes	no	yes	no	yes	no	no	no	yes	E3	GA	GG
255	ulcerative colitis	male	26	A2	never	no	yes	yes	no	no		yes	no	no	no		E3	GA	GG
262	ulcerative colitis	female	21	A2	never	no	yes	yes	no	yes	no	yes	no	no	no	yes	E2	GG	GG
266	ulcerative colitis	male	40	A2	never	no	yes	yes	no	no		no	no	no	no		E2	GA	GG
269	ulcerative colitis	female	25	A2	current	no	yes	yes	no	yes	no	yes	yes	no	no	yes	E2	GA	GA
274	ulcerative colitis	male	44	A3	former	no	yes	yes	no	no		yes	no	no	no		E1	AA	GA
279	ulcerative colitis	male	27	A2	never	no	yes	yes	no	yes	yes	yes	yes	no	no	no	E2	GG	GG
280	ulcerative colitis	female	44	A3	never	no	yes	yes	no	no		yes	no	no	no		E3	GA	GA
282	ulcerative colitis	female	41	A3	never	no	yes	yes	no	no		yes	no	no	no		E1	GA	GG
286	ulcerative colitis	female	39	A2	never	no	yes	no	no	no		no	no	no	no		E1	GA	AA
287	ulcerative colitis	male	30	A2	former		yes	yes	no	no		no	no	no	no		E3	AA	GA
288	ulcerative colitis	female	47	A3	former	no	yes	no	no	no		no	no	no	no		E1	GG	GA
296	ulcerative colitis	male	15	A1	never	no	yes	yes	no	yes	no	yes	no	yes	no	yes	E3	AA	GA
322	ulcerative colitis	male	34	A2	never	yes	yes	yes	no	yes	yes	yes	no	no	no	yes	E2	AA	GA
329	ulcerative colitis	male	27	A2	current	no	yes	yes	no	no		no	no	no	no		E3	GA	GG
337	ulcerative colitis	female	33	A2	never	no	yes	yes	no	yes	no	yes	no	no	no	yes	E3	GG	GA
338	ulcerative colitis	female	41	A3		no	yes	yes	no	yes	yes	yes	no	no	no		E1	GG	GA
345	ulcerative colitis	female	34	A2		no	yes	yes	no	yes	yes	yes	yes	yes	yes	yes	E3	GG	GG
354	ulcerative colitis	female	46	A3	never	no	yes	yes	no	yes	yes	yes	no	no	no		E1	GA	GG
359	ulcerative colitis	female	42	A3	former	no	yes	yes	no	no		yes	yes	no	no		E1	GA	GA
370	ulcerative colitis	female	17	A2	never	no	yes	yes	no	yes		yes	yes	no	no	no	E3	AA	GG
377	ulcerative colitis	male	49	A3	former	no	yes	no	no	no		yes	no	no	no		E1	GA	AA
378	ulcerative colitis	female	24	A2	never	no	yes	no	no	no		no	no	no	no		E1	GA	GG
380	ulcerative colitis	female	24	A2			yes	yes	no	no		no	no	no	no		E1	AA	GG
381	ulcerative colitis	female	24	A2	never	no	yes	yes	no	yes	yes	yes	no	no			E2	AA	GG
382	ulcerative colitis	male	44	A3	former	yes	yes	yes	no	no		no	no	no	no		E1	GA	GA
384	ulcerative colitis	female	22	A2	never	yes	yes	yes	no	yes	yes	yes	no	no	no		E2	GA	GG
385	ulcerative colitis	male	38	A2	never	no	yes	yes	no	no		yes	no	no	no		E2	AA	GG
386	ulcerative colitis	female	58	A3	never	no	yes	no	no	no		no	no	no	no		E1	AA	GG
388	ulcerative colitis	male	62	A3		yes	yes	yes	no	yes	no	yes	no	yes	yes		E3	GA	GG
390	ulcerative colitis	male	73	A3	former	no		yes	no	no		yes	no	no	no		E2	GG	GG
392	ulcerative colitis	male	55	A3		no	yes	yes	no	no		yes	no	no	no		E2	GA	AA
397	ulcerative colitis	male	29	A2	never	no	yes	yes	no	no		yes	no	no	no		E1	GA	GG
398	ulcerative colitis	female	41	A3	never	no	yes	yes	no	yes	yes	yes	no	no	no		E2	GA	AA
404	ulcerative colitis	male	44	A3	former	no	yes	yes	no	yes	no	yes	no	no	no	yes	E1	GG	GG
406	ulcerative colitis	female	21	A2		no	yes	yes	yes	yes	yes	yes	yes	no	no		E3	GA	AA
418	ulcerative colitis	female	38	A2	never	no	yes	no	no	no		no	no	no	no		E1	AA	GA
419	ulcerative colitis	female	28	A2	former	no	yes	yes	no	yes		yes	yes	no	no	yes	E1	GA	GA
420	ulcerative colitis	male	54	A3	former	yes	yes	no	no	no		no	no	no	no		E1	GG	GG
421	ulcerative colitis	male	28	A2	never	no	yes	yes	no	no		no	no	no	no		E1	GG	GA
422	ulcerative colitis	female	33	A2	never	no	yes	yes	no	yes	no	yes	no	no	yes		E3	GA	GA
423	ulcerative colitis	female	33	A2	former	no	yes	yes	yes	yes	no	yes	yes	no	no	yes	E1	GA	GG
424	ulcerative colitis	male	46	A3	former	no	yes	no	no	no		no	no	no	no		E1	GA	AA
425	ulcerative colitis	female	15	A1	never	no	yes	yes	no	yes	yes	yes	yes	no	no		E3	AA	GA
426	ulcerative colitis	female	29	A2	never	no	yes	no	no	no		no	no	no	no		E1	GA	GG
427	ulcerative colitis	female	46	A3	former	no	yes	yes	no	no		yes	no	no	no		E1	AA	GA
428	ulcerative colitis	female	51	A3	never	no	yes	yes	no	no		no	no	no	no		E3	GG	GG
429	ulcerative colitis	female	11	A1	current	no	yes	yes	no	no		yes	no	no	no		E1	GG	GA
430	ulcerative colitis	female	51	A3	former	no	yes	yes	no	no		no	no	no	no		E2	AA	GG
431	ulcerative colitis	female	21	A2	never	no	yes	yes	no	no		yes	no	no	no		E1	GA	GG
432	ulcerative colitis	male	46	A3	former	no	yes	yes	no	yes	yes	yes	no	no	no		E3	AA	GG
433	ulcerative colitis	female	38	A2	former	no	yes	yes	no	no		yes	no	no	no		E1	GA	GG
434	ulcerative colitis	female	30	A2	never	no	yes	yes	no	yes	no	yes	no	no	no		E2	GG	GA
435	ulcerative colitis	male	27	A2	never	no	yes	yes	no	no		yes	no	no	no		E2	GA	GA
439	ulcerative colitis	male	34	A2	never	no	yes	no	no	no		no	no	no	no		E1	GA	GG
441	ulcerative colitis	male	30	A2	never	no	yes	yes	no	yes	yes	yes	yes	no	no		E3	GA	GA
442	ulcerative colitis	female	24	A2	current	no	yes	yes	no	no		no	no	no	no		E2	GG	GA
444	ulcerative colitis	male	34	A2		no	yes	yes	no	yes	yes	yes	yes	no	no		E3	GA	GA
448	ulcerative colitis	female	28	A2	never	no	yes	no	no	no		no	no	no	no		E1	AA	GA
452	ulcerative colitis	female	21	A2		no	yes	yes	no	yes	no	yes	no	no	no	yes	E3	GA	GG
453	ulcerative colitis	male	46	A3	former	no	yes	yes	no	no		yes	no	no	no		E3	GA	GA
454	ulcerative colitis	female	22	A2	former	no	yes	no	no	no		yes	no	no	no		E1	GG	GG
455	ulcerative colitis	female	26	A2	former	yes	yes	yes	no	yes	yes	yes	no	no	no	yes	E1	AA	GG
456	ulcerative colitis	female	49	A3	never	no	yes	no	no	no		no	no	no	no		E1	GA	GA
457	ulcerative colitis	male	29	A2	never	no	yes	yes	no	no		no	no	no	no		E3	GA	GA
458	ulcerative colitis	male	60	A3	former	no	yes	yes	no	no		no	no	no	no		E1	AA	GA
459	ulcerative colitis	female	24	A2	never	no	yes	yes	no	no		no	no	no	no		E1	GA	GA
460	ulcerative colitis	male	38	A2	former	no	yes	yes	no	no		yes	no	no	no		E3	AA	AA
462	ulcerative colitis	female	10	A1	never	no	yes	yes	no	no		yes	no	yes	yes		E3	AA	GA
463	ulcerative colitis	male	33	A2		no	yes	yes	yes	yes	yes	yes	yes	no	no		E3	GA	GA
464	ulcerative colitis	female	65	A3	former	no	yes	yes	no	no		no	no	no	no		E2	GA	GG
467	ulcerative colitis	female	20	A2	never	no	yes	yes	no	no		yes	no	no	no		E1	AA	GG
469	ulcerative colitis	female	33	A2	never	no	yes	no	no	no		no	no	no	no		E1	GA	GG
470	ulcerative colitis	male	59	A3	former	no	yes	yes	no	yes	yes	yes	yes	no	no	yes	E3	AA	GA
471	ulcerative colitis	male	33	A2	former	yes	yes	yes	no	no		yes	yes	no	no		E3	GG	GG
474	ulcerative colitis	female	21	A2	never	no	yes	yes	no	yes	no	yes	yes	no	no	no	E3	AA	GG
475	ulcerative colitis	female	38	A2	former	no	yes	yes	no	no		yes	no	no	no		E1	GA	GA
478	ulcerative colitis	female	15	A1	never	no	yes	yes	no	no		yes	no	no	no		E2	AA	GG
479	ulcerative colitis	female	23	A2	never	no	yes	yes	no	no		yes	no	no	no	yes	E3	AA	GG
482	ulcerative colitis	female	50	A3	current	no	yes	no	no	no		no	no	no	no		E1	GA	AA
483	ulcerative colitis	female	46	A3	former	no	yes	yes	no	no		no	no	no	no		E3	GA	GA
484	ulcerative colitis	female	47	A3	former	no	yes	yes	no	no		no	no	no	no		E1	GA	GG
485	ulcerative colitis	female	23	A2	never	no	yes	yes	no	no		yes	yes	no	no		E1	AA	GG
486	ulcerative colitis	male	21	A2	current	no	yes	no	no	no		yes	no	no	no		E1	GA	GG
489	ulcerative colitis	female	24	A2	former	no	yes	yes	no	no		yes	no	no	no		E2	GA	GG
490	ulcerative colitis	female	51	A3	never	no	yes	yes	no	no		yes	yes	no	yes		E3	AA	GG
494	ulcerative colitis	male	25	A2	never	no	yes	yes	no	no		yes	no	no	no		E3	GA	GA
496	ulcerative colitis	male	40	A2	former	no	yes	yes	no	no		yes	yes	no	no		E2	AA	GA
498	ulcerative colitis	female	62	A3	former		yes	yes	no	no		no	no	no	no		E1	AA	GG
499	ulcerative colitis	male	25	A2	former	yes	yes	yes	no	yes	yes	yes	no	no	no		E2	AA	GA
500	ulcerative colitis	female	31	A2	never	no	yes	yes	no	no		yes	no	yes	yes		E3	AA	GA
505	ulcerative colitis	male	33	A2	former		yes	yes	no	yes	yes	yes	yes	no	no		E3	GA	GG
511	ulcerative colitis	female	43	A3		no	yes	yes	no	yes	yes	yes	yes	no	no		E1	GA	AA
512	ulcerative colitis	female	22	A2		no	yes	yes	no	no		yes	no	no	no		E2	AA	GA
514	ulcerative colitis	male	31	A2	former	no	yes	yes	no	no		yes	no	no	no		E3	GA	GA
515	ulcerative colitis	female	33	A2	never	no	yes	yes	no	yes	yes	yes	no	no	no	yes	E2	GG	GA
522	ulcerative colitis	male	44	A3	former	yes	no	yes	no	yes	no	yes	yes	no	no	yes	E3	AA	GA
524	ulcerative colitis	male	57	A3	former		yes	yes	no	no		no	no	no	no		E1	GA	GG
525	ulcerative colitis	female	54	A3	never	no	yes	yes	no	no		yes	no	no	no		E2	AA	AA
531	ulcerative colitis	female	21	A2	current	no	yes	yes	no	no		yes	no	no	no		E2	GG	GG
532	ulcerative colitis	female	22	A2	never	no	yes	no	no	no		yes	no	no	no		E1	GA	AA
533	ulcerative colitis	female	14	A1	never	no	yes	yes	no	yes	yes	yes	no	no	no	yes	E3	GG	GA
534	ulcerative colitis	female	48	A3	never	no	yes	no	no	no		no	no	no	no		E1	GG	GG
535	ulcerative colitis	male	41	A3	former	no	yes	yes	no	no		yes	no	no	no		E2	GG	GG
536	ulcerative colitis	male	47	A3	never	no	yes	yes	no	no		yes	no	no	no		E3	GA	AA
537	ulcerative colitis	male	31	A2		no	yes	yes	no	yes	no	yes	no	yes	yes		E3	GA	GA
538	ulcerative colitis	female	17	A2	never	no	yes	no	no	no		no	no	no	no		E1	GG	GA
539	ulcerative colitis	male	49	A3	never	no	yes	yes	no	yes	yes	yes	yes	no	no		E3	GG	GA
540	ulcerative colitis	female	31	A2	never	no	yes	yes	no	no		no	no	no	no		E3	GA	GG
541	ulcerative colitis	male	42	A3	former	no	yes	yes	no	no		no	no	no	no		E1	GA	GG
542	ulcerative colitis	female	34	A2	never		yes	yes	no	yes	yes	yes	no	no	no		E2	AA	AA
543	ulcerative colitis	male	42	A3	former	no	yes	yes	no	no		yes	no	no	no		E2	GA	GA
544	ulcerative colitis	female	21	A2	never	no	yes	no	no	no		yes	no	no	no		E1	GA	GA
545	ulcerative colitis	female	19	A2	never	no	yes	yes	no	yes	no	yes	no	no	no	yes	E3	GA	GA
546	ulcerative colitis	female	32	A2	never	no	yes	yes	no	no		yes	no	no	no		E2	GG	GA
547	ulcerative colitis	female	29	A2	never	no	yes	yes	no	yes	no	yes	no	no	yes		E3	GA	GG
548	ulcerative colitis	female	26	A2	former	no	yes	no	no	no		yes	no	no	no		E1	AA	GG
549	ulcerative colitis	male	44	A3	former	no	yes	yes	no	no		yes	no	no	no		E3	GA	GA
550	ulcerative colitis	male	44	A3	former	no	yes	yes	no	yes	yes	yes	no	no	no		E1	GA	AA
551	ulcerative colitis	female	48	A3	never	no	no	yes	no	no		yes	no	no	no		E3	AA	GA
552	ulcerative colitis	male	64	A3	former	no	yes	yes	no	no		no	no	no	no		E3	AA	AA
553	ulcerative colitis	female	57	A3	never	no	yes	yes	no	no		yes	no	no	no		E3	AA	GA
554	ulcerative colitis	female	57	A3	never		yes	no	no	no		no	no	no	no		E1	AA	GA
555	ulcerative colitis	female	38	A2	never		yes	yes	no	no		no	no	no	no		E1	GG	GA
556	ulcerative colitis	male	72	A3	former	no	yes	yes	no	yes	no	yes	yes	no	no		E2	GA	GG
558	ulcerative colitis	male	29	A2	former	no	yes	yes	no	no		yes	no	yes	yes		E3	GA	GG
559	ulcerative colitis	female	41	A3	never	no	yes	yes	no	yes	no	yes	no	no	no		E2	AA	GG
560	ulcerative colitis	female	67	A3	never	no	yes	yes	no	no		no	no	no	no		E1	GA	GA
561	ulcerative colitis	male	58	A3	former	no	yes	no	no	no		no	no	no	no		E1	GA	AA
562	ulcerative colitis	female	20	A2	never	no	yes	no	no	no		no	no	no	no		E1	GG	GG
563	ulcerative colitis	male	36	A2	former	no	yes	yes	no	no		yes	no	no	no		E3	GA	AA
564	ulcerative colitis	male	33	A2	never		yes	yes	no	no		yes	no	no	no		E2	GA	AA
565	ulcerative colitis	female	45	A3	never	no	yes	no	no	no		yes	no	no	no		E1	GA	GG
566	ulcerative colitis	male	48	A3	former	no	yes	yes	no	no		yes	no	no	no		E1	GA	GA
567	ulcerative colitis	female	36	A2	never		yes	yes	no	no		no	no	no	no		E1	AA	GG
568	ulcerative colitis	female	45	A3	never	no	yes	yes	no	yes	yes	yes	no	no	no		E2	AA	GA
569	ulcerative colitis	female	31	A2	never	no	yes	yes	no	yes	yes	yes	no	no	no		E1	GA	AA
570	ulcerative colitis	male	32	A2	current	no	yes	yes	no	no		yes	yes	yes	yes		E3	GG	GA
571	ulcerative colitis	female	28	A2	never	yes	yes	yes	no	no		no	no	no	no		E1	GA	GA
572	ulcerative colitis	female	36	A2	never	no	yes	no	no	no		yes	no	no	no		E1	GG	GG
574	ulcerative colitis	female	35	A2	never	no	yes	no	no	no		no	no	no	no		E1	AA	GA
575	ulcerative colitis	male	33	A2	former	no	yes	no	no	no		no	no	no	no		E1	GA	AA
576	ulcerative colitis	male	65	A3	former		yes	no	no	no		no	no	no	no		E1	GA	GG
577	ulcerative colitis	female	37	A2	never	no	yes	yes	no	no		no	no	no	no		E1	GG	GA
578	ulcerative colitis	female	44	A3	never	no	no	no	no	yes	no	yes	no	no	no		E1	GA	GA
579	ulcerative colitis	female	45	A3	never	no	yes	no	no	no		yes	no	no	no		E1	GG	GA
580	ulcerative colitis	male	26	A2	never	no	yes	yes	no	no		no	no	no	no		E1	GG	GA
581	ulcerative colitis	female	19	A2	never	no	yes	yes	no	yes	no	yes	yes	no	no	no	E3	AA	AA
582	ulcerative colitis	female	39	A2	never	no	yes	yes	no	yes	no	no	no	no	yes		E3	GA	GG
583	ulcerative colitis	female	30	A2	never	no	yes	yes	no	no		no	no	no	no		E3	GA	AA
584	ulcerative colitis	male	57	A3	current		yes	yes	no	no		yes	no	no	no		E2	GA	GA
585	ulcerative colitis	female	36	A2	former		yes	yes	no	no		no	no	no	no		E1	GA	GG
586	ulcerative colitis	male	28	A2	never	no	yes	yes	no	no		no	no	no	no		E1	GA	AA
587	ulcerative colitis	female	23	A2	never	no	yes	yes	no	yes		yes	yes	no	no		E3	GA	GA
588	ulcerative colitis	female	37	A2	never	no	yes	no	no	no		no	no	no	no		E1	GA	GA
589	ulcerative colitis	male	31	A2	current		yes	no	no	no		no	no	no	no		E1	AA	GG
590	ulcerative colitis	female	45	A3	never	no	yes	no	no	no		yes	no	no	no		E1	AA	GG
593	ulcerative colitis	female	26	A2	former		yes	yes	no	no		yes	no	no	no		E1	GA	GA
594	ulcerative colitis	female	53	A3	never	no	yes	yes	no	no		yes	no	no	no		E2	GA	GG
595	ulcerative colitis	female	24	A2	never		no	yes	no	no		yes	yes	no	no		E3	GA	GA
596	ulcerative colitis	female	18	A2	never	no	yes	yes	no	no		no	no	no	no		E1	GA	GG
599	ulcerative colitis	male	37	A2	never		yes	no	no	no		no	no	no	no		E1	GG	GA
631	ulcerative colitis	male	24	A2	never	no	yes	yes	no						no		E3	GA	GG
632	ulcerative colitis	female	45	A3	current	no	yes	yes	no	yes	no	yes	yes	no	no	yes	E2	GA	GG
633	ulcerative colitis	male	23	A2	former	no	yes	yes	no	yes	no	yes	yes	no	no	yes	E2	GA	AA
634	ulcerative colitis	female	18	A2	never	no	yes	yes	no	yes	no	yes	no	no	no	yes	E2	GG	GA
635	ulcerative colitis	female	29	A2	never	no	yes	yes	no	yes	yes	yes	yes	no	no		E3	GA	GA
636	ulcerative colitis	female	49	A3	former	no	yes	yes	no	yes	yes	yes	no	no	no		E2	AA	AA
637	ulcerative colitis	female	30	A2	former	no	yes	yes	no	yes	yes	yes	no	yes	yes	no	E3	GA	GG
638	ulcerative colitis	female	41	A3	never	no	yes	yes	no	yes	yes	no	yes	no	no		E1	GG	GA
639	ulcerative colitis	male	22	A2	never	no	yes	yes	no	yes	no	yes	no	yes	no	no	E2	GA	GA
640	ulcerative colitis	female	34	A2	never	no	yes	yes	no	yes	yes	yes	yes	no	no		E2	GA	GG
641	ulcerative colitis	female	53	A3	former	no	yes	yes	no	yes	no	yes	yes	no	no	yes	E2	GA	GG
642	ulcerative colitis	female	24	A2	current	yes	yes	yes	no	yes	no	yes	yes	no	no	no	E3	GA	GG
9260	ulcerative colitis	male	36	A2	former	no				no		no			no		E1	AA	AA
9261	ulcerative colitis	female	44	A3	former					yes	yes	yes	yes	no	no		E2	GA	GG
9262	ulcerative colitis	female	36	A2	never	yes				yes	yes	yes	yes	no	no		E1	AA	AA
9263	ulcerative colitis	male	30	A2		no				no		no			no		E1	AA	GA
9264	ulcerative colitis	male	48	A3	current	no				no		no			no		E2	GA	GA
9265	ulcerative colitis	female	44	A3	never	no				no		no			no		E3	GG	GG
9266	ulcerative colitis	female	21	A2	never	no				yes	yes	yes	no	yes	no	yes	E1	GA	GA
9267	ulcerative colitis	male	18	A2	never	no				yes	yes	yes	no	yes	no	yes	E2	AA	GG
9270	ulcerative colitis	male	52	A3	never	no				no		no			no		E3	GA	GG
9273	ulcerative colitis	male	44	A3	former	no				no		no			no		E2	GA	GG
9274	ulcerative colitis	male	38	A2	former	no				no		no			no		E3	GA	GA
9275	ulcerative colitis	male	21	A2	never	no				no		no			no		E3	GA	GA
9276	ulcerative colitis	female	29	A2	never	no				yes		yes	no	no	no		E2	AA	GA
9277	ulcerative colitis	male	28	A2	never	no				no		no			no		E1	GG	AA
9278	ulcerative colitis	male	41	A3	current	yes				no		yes	no	no	no		E1	GA	GA
9279	ulcerative colitis	female	25	A2	never	no				no		no			no		E1	GA	GA
9280	ulcerative colitis	male	33	A2	never					no		yes	no	no	no		E2	GA	GA
9281	ulcerative colitis	male	69	A3	never	no				no		yes	no	yes	no	yes	E3	GG	GA
9282	ulcerative colitis	male	58	A3	former	no				no		no			no		E2	GA	AA
9283	ulcerative colitis	male	36	A2	never	no				yes	yes	yes	yes	no	no		E3	AA	GG
9284	ulcerative colitis	female	41	A3	never	no				no		no			no		E2	GA	GG
9285	ulcerative colitis	female	29	A2	never					no		no			no		E1	GA	GG
9286	ulcerative colitis	female	58	A3	never					no		yes	no	yes	no	yes	E1	GA	GA
9287	ulcerative colitis	male	39	A2	never					yes	yes	yes	yes	no	no	yes	E3	GA	AA
9288	ulcerative colitis	female	16	A1	never					no		no			no		E3	GA	GA
9289	ulcerative colitis	female	14	A1	never					yes	yes	yes	yes	no	no		E2	AA	AA
9290	ulcerative colitis	female	31	A2	never					no		no			no		E3	AA	GG
9291	ulcerative colitis	male	20	A2	never	no				no		no			no		E1	GG	GG
9292	ulcerative colitis	male	58	A3	never					no		no			no		E1	AA	AA
9293	ulcerative colitis	male	35	A2	never					no		no			yes		E3	GA	GA
9294	ulcerative colitis	female	36	A2	never					no		no			no		E3	AA	GG
9295	ulcerative colitis	male	23	A2	never					no		no			no		E1	AA	GA
9296	ulcerative colitis	female	34	A2	never					no		no			no		E3	GG	GA
9297	ulcerative colitis	male	58	A3	former					no		no			no		E1	GG	GG
9298	ulcerative colitis	male	24	A2	never					yes	yes	yes	yes	yes	yes	yes	E2	GG	GG
9299	ulcerative colitis	female	50	A3	never					no		yes	yes	yes	yes		E3	AA	GG
9300	ulcerative colitis	female	43	A3	never					no		no			no		E1	GA	GA
9301	ulcerative colitis	female	37	A2	current					no		no			no		E1	GG	GA
9302	ulcerative colitis	female	42	A3	never					no		yes	no	no	no		E2	GG	GA
9303	ulcerative colitis	male	41	A3	former					no		no			no		E2	GG	AA
9304	ulcerative colitis	male	45	A3	never					yes	yes	yes	yes	no	no		E2	GA	GA
9305	ulcerative colitis	male	37	A2	never					no		no			no		E3	AA	GG
9306	ulcerative colitis	female	32	A2	current	no				no		no			no		E1	AA	AA
9307	ulcerative colitis	female	62	A3	never					no		no			no		E2	GA	GA
9308	ulcerative colitis	female	22	A2	never					no		no			no		E3	GG	GA
9309	ulcerative colitis	male	27	A2	never					yes		yes	yes	yes	no	yes	E3	AA	AA
9310	ulcerative colitis	male	45	A3	never					yes		yes	yes	no	no	yes	E3	GA	GA
9311	ulcerative colitis	male	63	A3	never					yes		yes	yes	no	no	yes	E3	GG	GA
9312	ulcerative colitis	male	29	A2	current					no		no			no		E1	GG	GA
9313	ulcerative colitis	male	41	A3	former					no		no			no		E2	AA	GA
9314	ulcerative colitis	female	46	A3	never					no		yes	no	no	no		E3	AA	GG
9315	ulcerative colitis	female	22	A2	never					yes	yes	yes	yes	no	no		E2	GA	GG
9316	ulcerative colitis	female	64	A3	never					no		no			no		E3	GG	GA
9317	ulcerative colitis	male	34	A2	current					no		yes	no	no	no		E2	GA	GA
9318	ulcerative colitis	female	27	A2	never					no		no			no		E3	AA	GA
9319	ulcerative colitis	male	32	A2	current					yes	yes	yes	yes	no	no		E2	AA	GG
9320	ulcerative colitis	female	63	A3	never					no		yes	no	no	no		E2	GG	GA
9321	ulcerative colitis	female	24	A2	never	no				no		no			no		E2	GA	AA
9322	ulcerative colitis	female	21	A2	never					yes	yes	yes	yes	no	no	yes	E2	AA	GG
9323	ulcerative colitis	male	32	A2	current	no				no		yes	no	no	yes		E1	GG	GA
9324	ulcerative colitis	female	21	A2	never					no		no			no		E2	GA	GG
9325	ulcerative colitis	female	41	A3	never					no		no			no		E3	GG	GG
9326	ulcerative colitis	male	37	A2	current					no		no			no		E2	GA	GG
9327	ulcerative colitis	female	35	A2	never					no		no			no		E2	AA	GA
9328	ulcerative colitis	female	46	A3	never					no		yes	no	no	no		E3	AA	GA
9329	ulcerative colitis	male	23	A2	never					no		yes	no	no	no		E2	AA	GG
9330	ulcerative colitis	female	29	A2	never					no		yes	no	no	no		E1	GG	GA
9331	ulcerative colitis	female	58	A3	never					no		no			no		E2	GA	AA
9332	ulcerative colitis	male	54	A3	former					no		no			no		E3	GG	GG
9333	ulcerative colitis	male	39	A2	never					yes	yes	yes	yes	no	no		E3	GA	GA
9334	ulcerative colitis	female	58	A3	never					no		yes	no	no	no		E2	GA	GG
9335	ulcerative colitis	male	46	A3	former					no		no			no		E3	GA	GG
9336	ulcerative colitis	male	52	A3	former					no		no			no		E2	AA	GG
9337	ulcerative colitis	male	58	A3	current					no		no			no		E3	GG	GA
9338	ulcerative colitis	male	35	A2	former					yes	yes	yes	yes	no	no		E2	GA	GG
9339	ulcerative colitis	male	56	A3	never					no		no			no		E3	GA	GG
9340	ulcerative colitis	male	33	A2	former					no		no			no		E1	GG	AA
9341	ulcerative colitis	female	32	A2	never					no		no			no		E3	GA	GA
9342	ulcerative colitis	male	47	A3	former					no		no			no		E3	GA	AA
9343	ulcerative colitis	male	21	A2	current					yes		yes	no	no	no		E1	GG	GG
9344	ulcerative colitis	male	53	A3	never					no		no			no		E2	GA	GG
9345	ulcerative colitis	female	47	A3	current					yes	yes	yes	no	no	no		E1	GG	GA
9346	ulcerative colitis	female	27	A2	never					no		no			no		E1	AA	GG
9347	ulcerative colitis	male	48	A3	former	no				no		no			no		E3	GA	GG
9348	ulcerative colitis	female	19	A2	never					yes	yes	yes	no	yes	no	yes	E2	AA	GG
9349	ulcerative colitis	female	45	A3	never					yes	yes	yes	no	no	no		E3	AA	AA
9350	ulcerative colitis	female	32	A2	never					no		yes	no	no	no		E3	GA	GG
9351	ulcerative colitis	female	25	A2	current					no		no			no		E1	GG	GG
9352	ulcerative colitis	female	65	A3	never					no		no			no		E2	GA	GA
9353	ulcerative colitis	male	34	A2	never					yes	yes	yes	yes	no	no		E1	AA	GG
9354	ulcerative colitis	male	64	A3						no		no			no		E1	GG	GA
9355	ulcerative colitis	female	21	A2	never					no		no			no		E3	GG	GA
9356	ulcerative colitis	male	54	A3	never					yes	yes	yes	yes	no	no		E1	AA	GA
9357	ulcerative colitis	male	29	A2	never					no		no			no		E1	GA	AA
9358	ulcerative colitis	male	32	A2	never					no		no			no			GG	GA
9359	ulcerative colitis	female	26	A2	never	no				no		no			no		E2	GA	GA
9360	ulcerative colitis	male	38	A2	never					no		no			no		E2	GA	GG
9361	ulcerative colitis	female	51	A3	never					no		no			no		E1	GG	GG
9362	ulcerative colitis	female	21	A2	never					no		no			no		E2	AA	GG
9363	ulcerative colitis	female	52	A3	never					no		no			no		E2	GA	GA
9364	ulcerative colitis	female	25	A2	never					no		no			no		E2	GA	GA
9365	ulcerative colitis	male	74	A3	former					no		no			no		E3	GA	GA
9366	ulcerative colitis	male	38	A2	former					no		no			no		E2	GA	GG
9367	ulcerative colitis	male	50	A3	current					no		no			no		E1	AA	GG
9368	ulcerative colitis	male	42	A3	never					no		yes	no	no	no		E2	GA	GA
9369	ulcerative colitis	male	48	A3	current					no		no			no		E1	GG	GG
9370	ulcerative colitis	female	49	A3	never					no		no			no		E3	GA	GG
9371	ulcerative colitis	female	26	A2	current	no				no		yes	no	no	no			GG	GG
9372	ulcerative colitis	female	26	A2	current					no		yes	no	no	no		E1	GG	GG
9373	ulcerative colitis	female	49	A3	never					no		no			no		E1	AA	AA
9374	ulcerative colitis	male	52	A3	former					no		no			no		E1	GA	GG
9375	ulcerative colitis	female	21	A2	never					no		yes	no	yes	yes		E2	GA	GA
9376	ulcerative colitis	female	29	A2	never	no				no		no			no		E3	GG	AA
9377	ulcerative colitis	male	26	A2	never					no		yes	no	no	no		E2	AA	AA
9378	ulcerative colitis	female	22	A2	never					no		no			no		E2	GA	GA
9379	ulcerative colitis	female	67	A3	never					no		no			no		E1	AA	GG
9380	ulcerative colitis	female	29	A2	never					no		no			no		E2	AA	GG
9381	ulcerative colitis	male	14	A1	never					yes	yes	yes	yes	yes	no		E1	GG	GA
9382	ulcerative colitis	female	36	A2	never					no		no			no		E1	GA	GG
9383	ulcerative colitis	female	25	A2	never					no		no			no		E3	GA	GA
9384	ulcerative colitis	female	4	A1	never					no		yes	yes	no	no		E3	GA	GA
9385	ulcerative colitis	male	42	A3	former					yes	yes	yes	no	yes	no	yes	E1	GA	GA
9386	ulcerative colitis	male	35	A2		no				no		yes	no	no	yes		E3	GA	GG
9387	ulcerative colitis	female	25	A2	never					yes	yes	yes	no	no	no		E1	GA	AA
9388	ulcerative colitis	female	32	A2	never	no				no		no			no		E3	GA	GA
9389	ulcerative colitis	male	19	A2	current					yes	yes	yes	no	no	no		E3	GG	AA
9390	ulcerative colitis	female	48	A3	never					yes	yes	yes	yes	no	yes		E1	GA	GA
9391	ulcerative colitis	female	36	A2	never					no		no			no		E3	GA	GG
9392	ulcerative colitis	female	23	A2	never					no		no			no		E1	GA	GG
9393	ulcerative colitis	female	34	A2	current					no		no			no			AA	GA

## Sheet: Crohn's disease study
participant number	disease	sex	age at diagnosis	age at diagnosis (categories)	smoking habits	family history of IBD	location	involvement of the upper digestive tract	behaviour	perianal disease	rectal involvement	colonic involvement	abdominal surgery	extraintestinal manifestations	previous ongoing corticosteroids	steroid dependency	steroid resistance	need for immunosuppressant	response to immunosuppressant	response to biologics	rs4880	rs1050450
1	Crohn's disease	male	25	A2		no	L1	no	B3	no	no	no	no	no	yes	yes	no	yes	yes		AA	GG
2	Crohn's disease	male	38	A2			L1	no	B3	no	no	no	yes	no	yes	yes	no	yes	no	yes	GA	GG
4	Crohn's disease	male	17	A2			L1	no	B3	no	no	no	yes	no	yes	no	no	yes	no	yes	GA	GG
9	Crohn's disease	female	38	A2	never	no	L1	no	B2	no	no	no	yes	no	yes	no	no	no			AA	GG
10	Crohn's disease	male	18	A2	current	yes	L3	yes	B1	no	yes	no	no	yes	yes	yes	no	yes	yes	no	AA	AA
11	Crohn's disease	male	34	A2	former	no	L3	no	B3	no	no	yes	yes	no	yes	yes	no	yes	no	yes	AA	GG
12	Crohn's disease	male	34	A2	current	no	L1	no	B3	no	no	no	yes	no	yes	no	no	yes	yes	yes	AA	GA
13	Crohn's disease	male	24	A2	former	no	L3	no	B3	no	no	yes	yes	no	yes	yes	no	yes	yes		GG	GA
14	Crohn's disease	female	23	A2	never	no	L3	no	B1	no	no	yes	no	no	yes	no	no	yes	yes		GG	GA
15	Crohn's disease	male	21	A2	never	no	L3	no	B1	no	no	yes	no	no	yes	no	no	yes	yes		GA	GG
16	Crohn's disease	female	25	A2	current	no	L3	no	B1	no	no	yes	yes	no	yes	no	no	yes	yes	yes	GA	GG
17	Crohn's disease	female	24	A2	former		L1	no	B3	no	no	no	yes	no	no	no	no	yes	no		GA	GG
18	Crohn's disease	male	33	A2	current	no	L1	no	B3	no	no	no	yes	no	yes	no	no	yes	yes		GA	GA
19	Crohn's disease	female	22	A2	current	no	L3	no	B3	yes	yes	yes	yes	no	yes	no	yes	yes	yes	yes	AA	GA
20	Crohn's disease	female	30	A2	never	no	L1	no	B2	no	no	no	yes	no	yes	yes	no	yes	yes	yes	AA	GG
21	Crohn's disease	male	23	A2	never	yes	L3	no	B1	no	no	yes	no	no	no	no	no	yes	yes		GA	GA
22	Crohn's disease	female	16	A1	never	no	L3	no	B3	no	yes	yes	yes	no	yes	no	no	yes	no	yes	GA	GA
23	Crohn's disease	female	22	A2	never		L1	no	B3	yes	no	no	yes	no	yes	no	no	yes	no	yes	GA	GA
26	Crohn's disease	female	17	A2	former	no	L2	no	B1	no	yes	yes	yes	no	yes	no	yes	yes	no	no	GA	GA
27	Crohn's disease	male	33	A2	former	no	L3	no	B3	no	no	yes	yes	no	yes	yes	no	yes	yes		AA	GG
28	Crohn's disease	male	47	A3		no	L1	yes	B1	no	no	no	no	no	yes	no	no	yes	yes		AA	GA
29	Crohn's disease	female	38	A2	never	no	L1	no	B2	no	no	no	yes	no	yes	no	no	yes	yes		GA	GG
31	Crohn's disease	male	52	A3	former		L1	no	B1	no	no	no	no	no	yes	no	no	yes	yes		AA	GA
35	Crohn's disease	male	37	A2	former	no	L1	no	B3	no	no	no	yes	no	yes	yes	no	yes	no	no	GG	GG
39	Crohn's disease	female	25	A2	never	no	L2	no	B3	no	yes	yes	no	no	yes	yes	no	yes	no	no	GA	GG
40	Crohn's disease	male	15	A1	former		L3	no	B2	no	no	yes	no	no	yes	no	no	yes	yes		AA	GG
41	Crohn's disease	male	24	A2	never	no	L3	no	B1	yes	yes	yes	yes	no	yes	no	no	yes	yes	yes	GG	GA
42	Crohn's disease	male	45	A3	never	no	L1	no	B1	no	no	no	no	yes	yes	no	no	yes	yes		GA	GA
43	Crohn's disease	male	24	A2	never	no	L3	no	B3	yes	no	yes	no	no	yes	yes	no	yes	yes		AA	AA
45	Crohn's disease	female	55	A3	never		L1	no	B3	no	no	no	yes	no	yes	yes	no	yes	yes	yes	AA	GG
46	Crohn's disease	female	22	A2	current	no	L3	no			no	no	no	no	yes	yes	no	yes	yes	yes	AA	GA
47	Crohn's disease	male	18	A2	never	no	L1	no	B2	no	no	no	yes	no	yes	yes	no	yes	no	yes	GA	GA
48	Crohn's disease	female	60	A3	never	no	L3	no	B3	no	no	yes	no	no	yes	no	no	yes	no	yes	GA	AA
50	Crohn's disease	female	23	A2	never	no	L2	no	B1	no	no	no	yes	no	yes	no	no	yes	yes	yes	GA	GA
51	Crohn's disease	female	38	A2	current	no	L3	no	B1	no	yes	yes	yes	no	yes	no	no	yes	yes		GA	GA
52	Crohn's disease	female	35	A2	current	yes	L2	no	B1	no	yes	yes	yes	no	yes	yes	no	yes	no	no	GA	GG
53	Crohn's disease	female	31	A2	current	no	L3	no	B2	no	no	yes	yes	no	yes	yes	no	yes	no	yes	GA	GA
55	Crohn's disease	female	24	A2	former		L3	no	B3	no	no	yes	yes	no	yes	yes	no	yes	yes	yes	AA	GA
56	Crohn's disease	female	14	A1	former		L3	no	B1	no	no	yes	no	no	yes	no	no	yes	yes	yes	GG	GA
57	Crohn's disease	female	39	A2	never	no	L3	no	B2	no	no	yes	yes	no	yes	yes	no	yes	no	no	AA	GG
58	Crohn's disease	male	19	A2	current	no	L1	no	B2	no	no	no	no	no	yes	yes	no	yes	no	yes	GA	GG
61	Crohn's disease	female	19	A2	never	no	L3	no	B1	no	no	yes	no	no	yes	yes	no	yes	yes	yes	GA	GG
63	Crohn's disease	male	16	A1	current	no	L1	no	B2	no	no	no	yes	no	yes	no	no	no			GA	GG
65	Crohn's disease	female	55	A3	never	no	L1	no	B3	no	no	no	yes	no	yes	no	no	yes	yes		GG	GA
66	Crohn's disease	female	18	A2	never	no	L1	no	B3	yes	no	no	yes	no	yes	no	no	no			GA	GA
68	Crohn's disease	female	48	A3	former	yes	L3	no	B2	no	no	yes	no	yes	yes	yes	no	yes	yes	yes	GA	GA
70	Crohn's disease	male	15	A1	never	yes	L3	yes	B1	yes	yes	yes	yes	no	yes	no	no	yes	yes		GG	GA
71	Crohn's disease	male	34	A2	current	no	L3	no	B2	no	no	yes	no	no	yes	no	no	yes	yes		GG	AA
72	Crohn's disease	female	33	A2	never	no	L1	no	B1	no	no	no	no	no	yes	yes	no	yes	yes		GG	GG
73	Crohn's disease	female	28	A2	current	no	L1	no	B3	no	no	no	yes	no	yes	no	no	yes	no	no	AA	GA
74	Crohn's disease	female	21	A2	current	no	L3	no	B3	no	no	yes	yes	no	yes	no	no	yes	yes	yes	GA	GA
75	Crohn's disease	female	40	A2	never	no	L3	no	B1	no	no	yes	no	no	yes	yes	no	yes	yes	yes	AA	GG
77	Crohn's disease	female	30	A2	never		L1	no	B1	no	no	no	yes	no	yes	yes	no	yes	yes		GA	GG
78	Crohn's disease	female	44	A3	current	no	L3	no	B2	no	no	yes	yes	no	yes	no	no	yes	no	yes	AA	GA
81	Crohn's disease	male	55	A3	former	no	L1	no	B3	no	no	no	yes	no	no	no	no	yes	yes		GA	GG
82	Crohn's disease	male	57	A3	never	no	L1	no	B2	no	no	no	no	no	yes	yes	no	yes	yes		GA	GG
84	Crohn's disease	male	22	A2	never	no	L1	no	B3	no	no	no	yes	no	yes	no	no	yes	yes	no	GA	GA
85	Crohn's disease	male	24	A2	never	no	L3	no	B3	no	no	yes	yes	no	yes	no	no	yes	yes		AA	GA
86	Crohn's disease	male	20	A2	current	yes	L1	yes	B1	no	no	no	no	no	yes	no	no	yes	no		AA	GG
87	Crohn's disease	male	30	A2	never	no	L3	no	B3	no	yes	yes	yes	no	yes	yes	no	yes	yes	yes	AA	GG
88	Crohn's disease	female	23	A2	never	no	L1	no	B1	no	no	no	no	no	yes	no	no	yes		no	GA	GA
90	Crohn's disease	female	16	A1	never	no	L1	no	B2	no	no	no	yes	yes	yes	no	no	yes	yes		GA	GG
91	Crohn's disease	male	45	A3	former	no	L1	yes	B1	no	no	no	no	no	yes	no	no	no			GA	GG
93	Crohn's disease	female	42	A3	never	no	L1	no	B2	no	no	no	yes	no	yes	yes	no	yes	yes		GG	GA
95	Crohn's disease	female	24	A2	never	no	L1	no	B2	no	no	no	no	no	yes	yes	no	yes	yes		GG	GA
97	Crohn's disease	male	34	A2	never	no	L3	no	B2	yes	no	yes	yes	no	yes	no	no	yes	yes		GA	GG
99	Crohn's disease	female	9	A1	never	no	L1	no	B3	no	no	no	yes	no	yes	yes	no	yes	yes		AA	GG
100	Crohn's disease	male	40	A2	former	no	L1	no	B1	no	no	no	no	no	yes	no	no	no			GA	GA
103	Crohn's disease	male	45	A3	current	no	L1	no	B2	no	no	no	yes	no	yes	no	no	yes	yes		GA	AA
104	Crohn's disease	male	22	A2	current	no	L1	yes	B1	no	no	no	no	no	yes	yes	no	yes	yes	yes	AA	GG
106	Crohn's disease	female	24	A2	never	no	L3	no	B3	no	yes	yes	yes	no	yes	no	no	yes	no	yes	GA	GG
109	Crohn's disease	male	24	A2	never	no	L1	no	B2	no	no	no	yes	no	yes	no	no	no		yes	GA	GA
112	Crohn's disease	male	18	A2	former	no	L3	no	B1	yes	no	yes	no	no	yes	no	no	yes	yes		GA	GG
115	Crohn's disease	female	21	A2	current	no	L3	no	B3	no	no	yes	yes	no	yes	no	no	yes	yes		AA	GA
122	Crohn's disease	female	28	A2	former		L3	no	B1	no	no	yes	no	no	yes	yes	no	yes	yes	yes	AA	GA
123	Crohn's disease	female	15	A1	current	no	L1	no	B2	no	no	no	no	no	yes	yes	no	yes	no	yes	GA	AA
126	Crohn's disease	female	18	A2	former	no	L1	no	B2	no	no	no	yes	no	yes	yes	no	yes	yes	yes	GA	GA
128	Crohn's disease	male	24	A2	former	no	L1	no	B3	no	yes	no	yes	no	yes	yes	no	yes	yes	yes	GA	GG
129	Crohn's disease	female	24	A2		no	L1	no	B3	no	no	no	no	no	yes	no	no	yes		yes	GG	GA
130	Crohn's disease	male	44	A3	former	no	L1	no	B2	no	no	no	yes	no	yes	yes	no	yes	no	yes	AA	AA
131	Crohn's disease	male	8	A1	never	no	L2	no	B2	no	yes	yes	no	no	yes	no	no	yes	no	yes	GG	GG
132	Crohn's disease	male	28	A2	current		L3	no	B1	yes	no	yes	no	no	yes	no	no	yes	yes	yes	GA	GA
133	Crohn's disease	male	23	A2	current	no	L3	no	B1	yes	no	yes	no	no	yes	yes	no	yes	no	yes	GG	GA
134	Crohn's disease	male	23	A2	never	no	L3	no	B1	yes	yes	yes	no	no	yes	yes	no	yes	yes	yes	GA	GA
135	Crohn's disease	male	13	A1	never	no	L2	no	B1	yes	no	yes	yes	no	yes	yes	no	yes	no	yes	GA	GG
136	Crohn's disease	female	31	A2	never	no	L1	no	B1	yes	no	no	no	no	yes	yes	no	yes	yes	yes	GA	GA
137	Crohn's disease	male	27	A2	never	no	L1	no	B3	no	no	no	yes	no	yes	no	no	yes	no	yes	AA	GG
139	Crohn's disease	female	25	A2	current	no	L3	no	B1	yes	yes	yes	no	no	yes	no	no	yes	yes	yes	GA	GA
140	Crohn's disease	female	31	A2	former	no	L3	no	B1	no	yes	yes	no	no	yes	no	no	yes	yes		AA	GA
141	Crohn's disease	male	13	A1	never		L1	no	B1	no	no	no	no	no	yes	no	no	yes	yes		GA	GG
143	Crohn's disease	female	19	A2	current	no	L2	no	B3	no	yes	yes	yes	no	yes	no	no	yes	yes	yes	GA	GG
144	Crohn's disease	male	17	A2	former	no	L3	no	B1	yes	yes	yes	no	no	yes	yes	no	yes	yes	yes	GA	GG
145	Crohn's disease	male	38	A2	never	no	L3	no	B3	no	yes	yes	yes	no	yes	no	no	yes	yes	yes	GG	GG
147	Crohn's disease	male	19	A2	former	yes	L1	no	B2	no	no	no	yes	no	yes	yes	no	yes	no	no	GA	AA
148	Crohn's disease	male	26	A2	current		L1	yes	B1	no	no	no	no	no	yes	no	no	yes	yes		GA	GA
149	Crohn's disease	female	20	A2	never		L3	no	B3	no	no	yes	yes	no	yes	no	no	yes	yes		AA
151	Crohn's disease	female	51	A3	former	no	L3	no	B2	no	no	yes	yes	no	yes	no	no	yes	no	yes	GA	GA
152	Crohn's disease	male	28	A2	current	no	L1	no	B3	no	no	yes	yes	no	yes	yes	no	yes	no	no	GA	GA
153	Crohn's disease	male	20	A2		no	L1	no	B3	no	no	no	no	no	yes	no	no	yes			GA	AA
154	Crohn's disease	male	17	A2		no	L3	no	B3	yes	yes	yes	yes	no	yes	yes	no	yes	no	yes	GG	GG
155	Crohn's disease	male	11	A1		no	L1	no	B1	yes	yes	yes	no	no	yes	yes	no	yes	no	no	AA	GG
156	Crohn's disease	female	16	A1	never	no	L1	no	B3	no	no	no	yes	yes	yes	yes	no	yes	no	yes	AA	GA
157	Crohn's disease	female	52	A3	current	no	L1	no	B3	no	no	yes	yes	yes	yes	no	no	yes	no	yes	AA	GG
158	Crohn's disease	female	14	A1	never	no	L3	no	B1	no	no	yes	yes	yes	yes	yes	no	yes	no	yes	AA	GA
161	Crohn's disease	male	25	A2	current	no	L1	no	B2	no	no	no	yes	no	yes	no	no	yes	no	yes	GG	GG
165	Crohn's disease	male	27	A2	current	no	L1	no	B1	no	no	yes	no	no	yes	no	no	yes	yes	yes	AA	GG
167	Crohn's disease	male	24	A2	former	no	L3	no	B3	no	yes	yes	yes	no	yes	yes	no	yes	yes	yes	GA	GA
168	Crohn's disease	male	18	A2	never	no	L3	no	B3	no	yes	no	yes	no	yes	yes	no	yes	yes		GA	GG
169	Crohn's disease	male	40	A2	former		L1	yes	B1	no	no	no	no	no	yes	no	no	yes	no	yes	GA	GA
170	Crohn's disease	male	14	A1	never		L3	no	B3	no	no	no	yes	no	yes	yes	no	yes	no	yes	GA	GA
172	Crohn's disease	male	29	A2	former	no	L1	no	B1	no	no	no	no	no	yes	yes	no	yes	yes		GA	GG
173	Crohn's disease	male	19	A2	former	no	L1	no	B1	no	no	no	no	no	yes	yes	no	yes	yes		GG	GA
174	Crohn's disease	female	20	A2		no	L3	no	B3	no	no	yes	yes	no	yes	yes	no	yes	no	yes	GA	GA
175	Crohn's disease	male	50	A3	never	no	L2	no	B3	no	yes	yes	no	no	yes	yes	no	yes	no	yes	GG	GG
179	Crohn's disease	male	35	A2	former	no	L2	no	B1	no	no	yes	no	no	yes	yes	no	yes	yes	yes	GG	GA
180	Crohn's disease	female	32	A2	current		L3	no	B1	no	yes	yes	yes	no	yes	no	no	yes	yes	yes	GA	GA
181	Crohn's disease	female	22	A2	former	yes	L2	no	B3	no	yes	yes	yes	no	yes	no	no	no			AA	GG
185	Crohn's disease	female	40	A2	current	no	L3	no	B1	no	yes	yes	no	no	yes	no	no	yes	no	no	GA	GA
186	Crohn's disease	male	61	A3	never	no	L1	yes	B1	no	no	no	no	no	yes	no	no	yes	yes		GA	GG
188	Crohn's disease	female	26	A2	current		L1	no	B1	no	no	no	no	no	yes	yes	no	yes	no	yes	GA
191	Crohn's disease	male	47	A3	current	no	L1	no	B1	no	no	no	no	no	no	no	no	yes	no	yes	GA	GA
192	Crohn's disease	female	33	A2	never	no	L3	no	B1	no	yes	yes	yes	no	yes	no	no	yes	no	yes	GA	GG
194	Crohn's disease	female	19	A2	former	no	L3	no	B2	no	no	yes	yes	no	yes	yes	no	yes	no	no	GA	GG
196	Crohn's disease	male	25	A2	current	no	L1	no	B3	no	no	no	yes	no	yes	yes	no	yes	no	yes	AA	AA
197	Crohn's disease	male	21	A2	current		L1	no	B1	no	no	no	no	no	yes	yes	no	yes	no	yes	GG	AA
202	Crohn's disease	male	18	A2	former	no	L3	no	B1	no	no	yes	no	no	yes	yes	no	yes	no	yes	GA	GG
203	Crohn's disease	male	27	A2		no	L1	no	B3	no	no	no	no	no	yes	no	no	yes	no	yes	GG	GA
205	Crohn's disease	female	39	A2	current		L3	no	B2	no	no	yes	no	no	yes	no	no	yes	no	yes	GG	GG
206	Crohn's disease	female	23	A2	current	no	L1	yes	B2	no	no	no	no	no	yes	no	no	yes	no	yes	AA	GG
208	Crohn's disease	male	38	A2	current		L2	no	B1	no	yes	yes	no	no	yes	no	no	yes	yes	yes	AA	GA
209	Crohn's disease	female	48	A3	current	no	L1	no	B2	no	no	no	no	yes	yes	no	no	yes	no	yes	GA	GG
210	Crohn's disease	female	11	A1	never		L1	no	B1	no	no	no	no	no	yes	yes	no	yes	no	yes	GA	GA
212	Crohn's disease	male	23	A2	current	no	L1	no	B2	no	no	no	no	no	yes	no	no	yes	yes	yes	GA	GA
213	Crohn's disease	female	33	A2	former	no	L2	no	B1	no	no	yes	no	yes	yes	yes	no	no		yes	AA	GA
216	Crohn's disease	male	27	A2	former	no	L1	no	B3	no	no	no	yes	no	yes	yes	no	yes	no	yes	GA	GG
217	Crohn's disease	female	47	A3	former		L1	no	B3	no	no	no	yes	no	no	no	no	yes	no	yes	GG	GA
218	Crohn's disease	female	25	A2	never		L1	no	B1	no	no	no	no	no	yes	no	no	yes	yes	yes	AA	GA
219	Crohn's disease	male	17	A2	former	no	L1	yes	B3	no	no	no	no	no	no	no	no	yes	no	no	GA	AA
221	Crohn's disease	male	13	A1	never		L3	no	B1	no	yes	yes	no	no	yes	yes	no	yes	no	yes	GA	GG
222	Crohn's disease	male	17	A2	never	no	L3	no	B1	no	yes	yes	yes	no	no	no	no	yes	yes	yes	GG	GA
224	Crohn's disease	male	16	A1	never	no	L1	no	B2	yes	no	no	yes	no	yes	yes	no	yes	yes	yes	GG	GG
226	Crohn's disease	female	8	A1	never	no	L1	yes	B1	no	no	yes	no	no	yes	yes	no	yes	no		AA	GG
230	Crohn's disease	male	42	A3	former	no	L1	no	B2	no	no	no	yes	no	yes	yes	no	yes	no	yes	AA	GG
231	Crohn's disease	male	29	A2	never	no	L2	no	B1	no	yes	yes	no	no	yes	yes	no	yes	no		GA	GA
232	Crohn's disease	female	18	A2	never	no	L2	no	B1	no	yes	yes	no	no	yes	no	no	yes	no	no	GG	GG
233	Crohn's disease	female	20	A2	never	no	L3	no	B1	no	yes	yes	yes	no	no	no	no	yes	no	yes	GG	GA
234	Crohn's disease	male	8	A1	never	no	L1	no	B1	no	no	no	no	no	yes	no	no	yes	no	yes	GA	AA
235	Crohn's disease	male	5	A1	never	yes	L1	yes	B2	no	no	no	no	yes	yes	yes	no	yes	no	yes	GA	GG
236	Crohn's disease	female	30	A2		no	L3	no	B1	no	no	yes	no	no	yes	yes	no	yes	yes	yes	GA	GA
237	Crohn's disease	female	16	A1	never	yes	L3	no	B3	no	no	yes	yes	no	yes	no	no	yes	yes	yes	AA	GG
238	Crohn's disease	male	20	A2	never		L3	no	B1	no	no	yes	yes	no	yes	no	no	yes	no	yes	GA	GA
239	Crohn's disease	male	13	A1	never	no	L3	yes	B1	no	no	yes	yes	no	yes	no	no	yes	no	yes	GG	GG
240	Crohn's disease	female	18	A2	never	no	L1	no	B1	no	no	no	no	no	yes	yes	no	yes	no	yes	GA	GA
241	Crohn's disease	male	20	A2	current	no	L1	no	B3	no	no	no	no	no	yes	yes	no	yes	no	yes	GA	GG
244	Crohn's disease	male	33	A2	former	no	L3	no	B2	no	no	no	yes	no	yes	yes	no	yes	no	yes	GA	GA
245	Crohn's disease	male	20	A2	current	no	L1	no	B1	no	no	no	no	no	yes	no	no	yes	no	yes	AA	GG
246	Crohn's disease	female	30	A2	former	no	L3	no	B3	no	no	yes	no	no	yes	yes	no	yes	no	yes	AA	GG
247	Crohn's disease	female	39	A2	never	no	L2	no	B1	no	no	yes	no	no	yes	yes	no	yes	no	yes	AA	GG
248	Crohn's disease	male	28	A2	never	no	L1	yes	B3	no	no	no	yes	no	yes	no	no	yes	no	yes	AA	GA
249	Crohn's disease	female	31	A2	current	no	L3	no	B1	no	yes	yes	no	no	yes	yes	no	yes	no	yes	GA	GA
250	Crohn's disease	male	24	A2	never	no	L2	no	B2	no	no	no	no	no	yes	no	yes	yes	no	yes	GG	AA
252	Crohn's disease	male	22	A2	current		L3	no	B1	no	yes	yes	no	no	yes	no	no	yes	no	yes	GA	GA
253	Crohn's disease	male	37	A2	current	no	L1	yes	B2	no	no	no	yes	no	yes	no	no	yes	yes	yes	GA	GG
254	Crohn's disease	male	30	A2	former	no	L2	no	B2	no	yes	yes	no	no	yes	yes	no	yes	yes	yes	GG	GG
256	Crohn's disease	female	40	A2	current	yes	L1	no	B2	no	no	no	yes	no	yes	no	no	yes	yes		GG	GG
257	Crohn's disease	female	20	A2	current	no	L2	yes	B2	no	no	yes	yes	no	yes	yes	no	yes	no	yes	AA	GG
259	Crohn's disease	female	23	A2	never	no	L1	yes	B3	no	no	yes	no	no	yes	yes	no	yes	no	yes	GA	GG
260	Crohn's disease	male	32	A2	former	no	L1	no	B3	no	no	no	yes	no	yes	yes	no	yes	yes	yes	GA	GA
261	Crohn's disease	male	21	A2	never	no	L3	no	B3	no	yes	yes	yes	no	yes	no	no	yes	yes		GA	GA
263	Crohn's disease	female	37	A2	never	no	L2	no	B1	no	no	yes	no	no	yes	no	no	yes	yes		GG	GG
265	Crohn's disease	male	26	A2	current	no	L3	no	B1	no	yes	yes	no	no	yes	yes	no	yes	no	yes	GA	GA
267	Crohn's disease	male	30	A2	former		L1	no	B3	no	no	no	yes	no	no	no	no	yes	yes		GA	GA
270	Crohn's disease	female	34	A2	never	no	L1	yes	B3	no	no	no	yes	no	yes	yes	no	yes	no	yes	AA	GG
272	Crohn's disease	male	25	A2	current	no	L3	no	B2	no	yes	yes	no	no	yes	yes	no	yes	no	yes	AA	GG
273	Crohn's disease	male	22	A2	current	no	L2	no	B3	no	no	yes	no	no	yes	yes	no	yes	yes	no		GA
275	Crohn's disease	male	23	A2	never	no	L3	no	B2	no	yes	no	no	no	yes	no	no	yes	no	yes	GA	GG
276	Crohn's disease	male	29	A2	never	no	L3	no	B2	no	yes	yes	yes	no	yes	yes	no	yes	yes	yes	GA	GG
277	Crohn's disease	male	17	A2	never	no	L2	no	B3	no	no	yes	yes	no	yes	no	no	yes	no	no	GA
281	Crohn's disease	female	28	A2	current	no	L1	no	B1	no	no	no	no	no	no	no	no	no			GA	GG
283	Crohn's disease	male	26	A2	never	no	L3	no	B3	no	no	yes	yes	no	yes	no	no	yes	no		GA	GG
284	Crohn's disease	female	17	A2	current	no	L3	yes	B1	no	no	yes	no	no	yes	yes	no	yes	no	yes	GA	GA
289	Crohn's disease	male	32	A2	current		L3	no	B3	no	no	yes	no	yes	yes	yes	no	yes	yes		GG
291	Crohn's disease	female	23	A2	never	no	L1	yes	B3	no	no	no	yes	no	yes	yes	no	yes		yes	GA	GA
292	Crohn's disease	female	25	A2	never	no	L3	no	B2	no	yes	yes	no	no	yes	yes	no	yes	yes	yes	GG	GA
293	Crohn's disease	male	16	A1	never	no	L2	no	B1	no	yes	yes	no	no	yes	yes	no	yes	no	yes	GA	GG
295	Crohn's disease	female	50	A3	never	no	L2	no	B1	no	yes	yes	no	no	yes	yes	no	yes	yes		AA	GA
297	Crohn's disease	male	28	A2	never	no	L1	yes	B1	no	no	no	no	no	yes	no	no	yes	no	yes	GA	GA
298	Crohn's disease	male	22	A2	former		L3	no	B1	no	no	yes	no	no	yes	yes	no	yes	no	yes	GA	GG
299	Crohn's disease	female	13	A1	never		L3	no	B1	no	no	yes	no	no	yes	no	no	yes	yes	no	GA	GG
301	Crohn's disease	male	24	A2	never		L2	no	B1	no	no	yes	no	no	yes	no	no	yes	no	yes	GG	GG
303	Crohn's disease	female	43	A3	never	no	L3	no	B3	no	yes	no	yes	no	yes	no	no	yes	yes	no	GA	GA
304	Crohn's disease	female	15	A1	never	no	L3	yes	B1	no	no	yes	no	no	yes	yes	no	yes	no	yes	GA	GG
305	Crohn's disease	male	23	A2	current		L1	yes	B1	no	no	no	no	no	yes	no	no	yes	no	yes	GA
309	Crohn's disease	male	18	A2	never	no	L2	no	B1	no	no	yes	no	no	yes	yes	no	yes	no	yes	GG	GG
310	Crohn's disease	female	29	A2	current	no	L3	no	B1	no	no	yes	no	no	yes	no	no	yes	yes	no	AA	GA
311	Crohn's disease	female	41	A3		no	L2	no	B1	no	yes	yes	no	no	yes	yes	no	yes	yes		AA	GA
312	Crohn's disease	male	30	A2		no	L3	no	B3	no	no	yes	yes	no	yes	no	no	yes	no	yes	GA	GA
314	Crohn's disease	male	18	A2	never		L3	no	B3	yes	no	yes	yes	no	yes	yes	no	yes	no	yes	GA	GG
315	Crohn's disease	female	21	A2	current	no	L2	no	B1	no	no	yes	no	no	yes	no	no	yes	no	no	GA	GA
316	Crohn's disease	male	15	A1	never	yes	L1	yes	B3	no	no	no	no	no	yes	no	no	yes	no	yes	GA	GG
317	Crohn's disease	male	24	A2	former		L1	no	B1	no	no	no	yes	no	yes	yes	no	yes	no		AA	GA
319	Crohn's disease	female	19	A2		no	L3	no	B1	no	no	yes	no	no	yes	yes	no	no		yes	GA	GG
320	Crohn's disease	male	14	A1		no	L3	no	B1	no	yes	yes	no	no	yes	no	no	yes	no	yes	AA	GG
323	Crohn's disease	female	11	A1	current	yes	L2	no	B1	no	yes	yes	no	no	yes	yes	no	yes	yes	yes	AA	GA
324	Crohn's disease	male	13	A1	never	no	L3	no	B1	no	no	yes	no	no	yes	no	yes	yes	no	yes	GA	GA
325	Crohn's disease	female	34	A2	never	no	L1	no	B1	no	no	no	no	no	yes	no	no	yes	no		GA	GA
326	Crohn's disease	female	19	A2	former		L1	yes	B2	yes	no	no	yes	no	yes	yes	no	yes	yes	yes	GA	GA
327	Crohn's disease	male	20	A2	never	no	L3	no	B3	no	no	yes	yes	no	yes	no	no	yes	no	yes	GG	GG
328	Crohn's disease	female	38	A2	never		L1	yes	B1	no	no	no	no	no	no	no	no	no		yes	GA	AA
331	Crohn's disease	male	21	A2	former		L3	no	B1	no	no	yes	no	no	yes	no	no	no			GA	GA
332	Crohn's disease	female	21	A2	never	no	L3	no	B2	no	no	yes	yes	no	yes	yes	no	yes	yes	no	GA	GA
333	Crohn's disease	male	21	A2	never	no	L3	no	B3	no	no	yes	yes	no	yes	yes	no	yes	no		AA	GG
334	Crohn's disease	male	30	A2	former	no	L1	no	B3	no	no	no	yes	no	no	no	no	yes	yes		GA	GA
336	Crohn's disease	male	28	A2	current	no	L3	no	B1	no	no	yes	no	no	yes	no	no	yes	no	yes	GA	GG
339	Crohn's disease	female	37	A2	former	no	L1	no	B1	no	no	no	no	yes	yes	yes	no	yes	yes		GA	GG
342	Crohn's disease	male	22	A2	former	no	L1	no	B3	no	no	no	yes	no	yes	yes	no	yes	yes		GG	GA
343	Crohn's disease	female	26	A2	current	no	L3	no	B1	no	no	yes	no	no	yes	no	no	no			GA	GA
344	Crohn's disease	female	27	A2	current	no	L2	no			yes	yes	no	no	no	no	no	no			GG	GG
346	Crohn's disease	female	19	A2	current	no	L3	no	B1	no	no	yes	yes	yes	yes	no	no	yes	no	yes	GG	GG
348	Crohn's disease	female	32	A2	current	no	L3	no	B1	no	no	yes	no	no	yes	yes	no	no		yes	GA	GG
349	Crohn's disease	female	26	A2	former	yes	L1	no	B3	no	no	no	yes	no	yes	no	no	yes	yes		AA	GA
350	Crohn's disease	female	48	A3	never	no	L1	yes	B1	no	no	no	no	no	no	no	no	yes	no		AA	GG
352	Crohn's disease	female	29	A2	never	no	L3	no			yes	yes	no	no	yes	no	no	yes	yes		AA	GA
353	Crohn's disease	male	32	A2	current	no	L1	no	B3	no	no	no	yes	no	yes	no	yes	yes	no	no	GG	GA
355	Crohn's disease	male	14	A1	never	no	L3	no	B1	no	no	yes	no	no	yes	yes	no	yes	yes	yes	GA	AA
356	Crohn's disease	female	30	A2	never	no	L2	no	B1	no	no	yes	no	no	yes	yes	no	yes	yes	yes	GG	GA
358	Crohn's disease	male	29	A2		no	L1	no	B2	no	no	no	yes	no	yes	yes	no	yes	yes	yes	GA	AA
360	Crohn's disease	male	21	A2	never	no	L1	no	B1	no	no	no	yes	no	yes	no	no	yes	no		AA	GA
361	Crohn's disease	male	17	A2	former	no	L1	no	B1	no	no	no	no	no	yes	no	no	yes	yes		GA	AA
362	Crohn's disease	male	16	A1		no	L3	no	B3	no	no	yes	yes	no	yes	no	no	yes	no	yes	GA	GA
363	Crohn's disease	female	40	A2	never	no	L1	no	B3	no	no	no	no	no	yes	no	yes	yes	yes		GA	GA
365	Crohn's disease	male	57	A3	former	no	L3	no			yes	yes	no	no	yes	yes	no	yes	no	no	GG	GA
366	Crohn's disease	male	32	A2	current		L1	no	B3	no	no	no		no							GA	GG
368	Crohn's disease	female	53	A3	never	no	L1	yes	B2	no	no	no	yes	no	yes	yes	no	yes		yes	GG	GA
369	Crohn's disease	male	22	A2	never	no	L1	yes	B2	no	no	no	no	no	yes	no	no	yes	yes		GG	GG
371	Crohn's disease	female	23	A2	former	no	L3	no	B2	no	no	yes	yes	no	yes	yes	no	yes	yes	yes	GA	GA
372	Crohn's disease	male	25	A2	never	no	L1	no	B1	no	no	no	no	no	no	no	no	yes	yes		AA	GG
373	Crohn's disease	male	15	A1	former	no	L3	no	B2	no	no	yes	no	no	yes	no	no	yes	yes	yes	GG	GG
374	Crohn's disease	female	42	A3	never		L3	no	B3	no	no	yes	yes	no	yes	no	no	yes	no	no	AA	GG
376	Crohn's disease	female	29	A2		no	L1	no	B3	no	no	no	yes	no	yes	yes	no	yes	yes	no	GA	GA
379	Crohn's disease	male	37	A2	current	no	L3	no	B3	no	no	yes	yes	no	yes	yes	no	yes	yes		GA	GA
383	Crohn's disease	female	29	A2	former		L1	no	B2	no	no	no	no	no	yes	no	no	yes	yes		AA	GA
387	Crohn's disease	female	21	A2	never	no	L3	no	B1	no	yes	yes	no	no	yes	no	no	yes	yes	yes	AA	GA
391	Crohn's disease	female	27	A2		no	L1	no	B3	no	no	no	yes	no	yes	no	no	yes	yes		GA	GG
393	Crohn's disease	male	18	A2		no	L1	no	B3	yes	no	no	yes	no	yes	yes	no	yes	yes	yes	AA	GA
394	Crohn's disease	male	18	A2	never	no	L1	no	B1	no	no	no	no	no	no	no	no	yes	yes		AA	GG
395	Crohn's disease	female	47	A3	former		L1	no	B2	no	no	no	no	no	yes	yes	no	yes	yes	yes	AA	GG
401	Crohn's disease	male	51	A3	former	no	L3	no	B1	no	no	yes	no	no	no	no	no	yes	yes		AA	GG
403	Crohn's disease	female	33	A2	current	no	L3	no	B3	no	yes	yes	no	no	yes	no	no	yes	yes	yes	GA	GG
405	Crohn's disease	male	38	A2	current	no	L3	no	B2	no	no	yes	yes	no	yes	no	no	yes	yes	yes	AA	GG
407	Crohn's disease	male	33	A2	current		L2	no	B1	no	no	yes	no	no	yes	no	no	yes	yes		GA	GG
409	Crohn's disease	male	30	A2		no	L3	no	B3	no	no	yes	yes	no	yes	no	no	yes	yes		GA	GA
411	Crohn's disease	male	18	A2	never	no	L3	no	B1	no	no	yes	no	no	yes	no	no	yes	yes	yes	GA	GA
412	Crohn's disease	male	18	A2	former	no	L1	no	B1	no	no	no	no	no	yes	no	no	yes	yes	yes	GG	GG
413	Crohn's disease	female	22	A2	former	no	L3	no	B3	no	no	no	no	no	yes	no	no	yes	no	yes	AA	GA
414	Crohn's disease	female	22	A2	current	no	L2	yes	B3	no	yes	yes	no	no	yes	no	no	yes	yes		GA	GA
416	Crohn's disease	male	34	A2			L1	no	B3	no	no	no	yes	no	yes	yes	no	yes	yes	yes	AA	GA
417	Crohn's disease	female	31	A2	current	no	L1	no	B3	no	no	no	yes	no	yes	no	no	yes	yes		AA	GG
436	Crohn's disease	male	36	A2	former	no	L3	no	B3	no	yes	yes	yes	no	yes	no	no	no		yes	AA	GG
437	Crohn's disease	male	37	A2	former	no	L1	no	B3	no	no	no	yes	no	no	no	no	no			AA	GG
438	Crohn's disease	male	45	A3	current	no	L1	no	B1	no	no	no	no	no	no	no	no	no			GA	GG
440	Crohn's disease	male	37	A2	former	no	L1	no	B2	no	no	no	yes	no	yes	yes	no	no			AA	GA
443	Crohn's disease	male	24	A2	former	no	L1	no	B3	no	no	no	no	no	yes	no	no	yes	no	yes	GA	GG
447	Crohn's disease	male	37	A2	former	no	L2	no	B3	no	no	yes	yes	no	yes	no	no	yes	no	yes	AA	GG
449	Crohn's disease	female	28	A2	current	no	L1	no	B2	no	no	no	yes	no	yes	yes	no	yes	yes		AA	GG
461	Crohn's disease	female	31	A2	current	no	L1	no	B2	no	no	no	yes	yes	yes	no	no	yes	no	no	AA	GA
465	Crohn's disease	female	45	A3	current		L1	no	B3	no	no	no	yes	no	no	no	no	yes	yes		AA	GA
466	Crohn's disease	female	22	A2	never	no	L1	no	B3	no	no	no	yes	no	yes	no	no	yes	yes		GA	GA
468	Crohn's disease	male	60	A3	former	no	L1	no	B1	no	no	no	no	no	no	no	no	no			GA	GG
473	Crohn's disease	female	41	A3	former	no	L3	no	B1	no	yes	no	yes	no	yes	yes	no	yes	yes	yes	GG	GA
477	Crohn's disease	female	21	A2	former	no	L1	no	B1	no	no	no	no	no	yes	no	no	yes	yes		GA	GA
488	Crohn's disease	male	22	A2	never	no	L1	no	B1	no	no	no	no	no	no	no	no	yes	yes	yes	AA	GG
491	Crohn's disease	female	49	A3	former	yes	L3	no	B2	no	no	yes	no	no	yes	no	no	yes	yes		AA	GG
492	Crohn's disease	female	47	A3	never	no	L1	no	B1	yes	no	no	no	no	yes	no	no	yes	no	yes	GA	GA
493	Crohn's disease	male	43	A3	former	no	L1	yes	B2	no	no	no	yes	no	yes	no	no	yes	yes	yes	GA	GG
502	Crohn's disease	male	14	A1		no	L3	no	B3	no	no	yes	yes	no	yes	no	no	yes	yes	no	AA	AA
513	Crohn's disease	male	13	A1	never	yes	L3	no	B1	no	no	yes	no	no	yes	no	no	yes	yes	yes	AA	GA
516	Crohn's disease	female	33	A2	former	no	L1	no	B2	no	no	no	yes	no	yes	no	no	yes		yes	GA	GG
517	Crohn's disease	male	31	A2	never	no	L2	no	B1	no	no	no	no	no	yes	no	no	no			AA	AA
518	Crohn's disease	female	45	A3	never	no	L2	no	B1	no	no	yes	yes	no	yes	yes	no	yes	yes		AA	AA
519	Crohn's disease	female	36	A2		no	L1	no	B2	no	no	no	yes	no	yes	no	no	yes	no	yes	AA	GG
523	Crohn's disease	female	28	A2	former	no	L2	no	B1	no	no	yes	yes	no	yes	no	yes	yes	no		AA	GG
526	Crohn's disease	female	50	A3	never	no	L1	no	B2	no	no	no	no	no	no	no	no	no			AA	GA
529	Crohn's disease	male	23	A2	former	no	L1	no	B1	no	no	no	no	no	yes	no	no	yes	no	yes	AA	GA
530	Crohn's disease	male	59	A3	current	no	L3	no	B1	no	no	yes	no	no	no	no	no	yes	yes		GG	GA
557	Crohn's disease	male	52	A3	current	no	L1	yes	B3	no	no	no	yes	no	yes	no	no	yes	no		GA	GG
591	Crohn's disease	female	53	A3	never	no	L3	no	B1	no	no	yes	no	yes	yes	yes	no	yes	no		AA	AA
597	Crohn's disease	male	32	A2	former	no	L1	no	B3	no	no	no	yes	no	no	no	no	yes	yes	yes	GA	GA
598	Crohn's disease	female	44	A3	former	no	L1	no	B3	no	yes	yes	no	no	no	no	no		yes	yes	GG	GG
600	Crohn's disease	female	26	A2	former	no	L3	no	B3	no	no	yes	yes	no	no	no	no	no			AA	AA
601	Crohn's disease	female	48	A3		no	L3	no	B1	no	no	yes	yes	no	yes	no	no	yes	yes	yes	AA	GG
602	Crohn's disease	female	32	A2	current	no	L3	yes	B2	no	yes	yes	yes	no	yes	no	no	yes	no	yes	GA	GG
603	Crohn's disease	male	64	A3	former	no	L3	no	B2	no	no	yes	yes	no	yes	no	no	yes	no	yes	AA	AA
604	Crohn's disease	female	26	A2	never	no	L1	no	B2	no	no	no	no	no	yes	no	no	yes	yes		AA	GA
605	Crohn's disease	male	50	A3	former	no	L1	no	B3	no	no	no	yes	no	yes	no	no	yes	no		GG	GG
606	Crohn's disease	female	20	A2	current	no	L3	no	B1	no	yes	no	no	no	yes	no	no	no			AA	AA
608	Crohn's disease	male	24	A2	former	no	L1	no	B3	no	no	no	yes	no	yes	yes	no	yes	yes		GA	GG
609	Crohn's disease	female	42	A3	never	no	L1	no	B1	no	no	no	no	no	yes	no	no	yes	yes		AA	GG
610	Crohn's disease	male	70	A3	former	no	L1	no	B1	no	no	no	yes	no	no	yes	no	yes	yes		AA	GG
611	Crohn's disease	male	18	A2	never	no	L1	no	B3	no	no	no	yes	no	no	yes	no	yes	yes		AA	GG
612	Crohn's disease	male	28	A2	former	no	L2	no	B1	no	no	no	no	no	yes	yes	no	yes		no	GA	GG
613	Crohn's disease	male	26	A2	former	no	L1	no	B3	no	no	no	yes	no	yes	yes	no	yes	yes		AA	GG
614	Crohn's disease	female	31	A2	former	no	L3	no	B1	no	no	yes	no	no	yes	yes	no	yes	yes		AA	GG
615	Crohn's disease	male	63	A3	former	no	L3	no	B1	no	yes	yes	no	no	yes	no	no	yes	yes	yes	AA	GG
616	Crohn's disease	male	29	A2	current	no	L3	no	B3	no	no	yes	yes	no	yes	no	no	yes	yes		AA	GA
617	Crohn's disease	male	56	A3	current	no	L2	no	B1	no	no	yes	no	no	yes	no	no	no			AA	AA
618	Crohn's disease	male	13	A1	never	no	L3	no	B1	no	no	no	no	no	no	no	no	yes	no		AA	GA
619	Crohn's disease	male	65	A3	former	no	L1	no	B1	no	no	no	yes	no	yes	no	no	no			GA	AA
620	Crohn's disease	male	46	A3	current	no	L1	yes	B1	no	no	no	no	no	yes	no	no	no			GA	AA
621	Crohn's disease	female	16	A1	never	no	L1	no	B1	no	no	no	no	no	yes	no	no	yes	yes		GA	AA
622	Crohn's disease	male	44	A3	current	no	L3	no	B2	no	no	yes	yes	no	yes	no	no	yes	yes		AA	GA
623	Crohn's disease	female	59	A3	never	yes	L2	no	B1	no	no	yes	no	no	yes	no	no	no			GA	GG
625	Crohn's disease	male	33	A2	never	yes	L2	no	B3	no	no	yes	yes	no	yes	no	no	yes	yes		GA	GG
626	Crohn's disease	female	45	A3	never	no	L1	no	B1	no	no	no	no	no	yes	no	no	yes	no		AA	GG
627	Crohn's disease	female	36	A2	former	no	L1	no	B1	no	no	no	no	no	yes	no	no	yes	yes		GA	GA
628	Crohn's disease	female	20	A2	former	no	L2	no	B3	no	yes	yes	yes	no	yes	no	no	no			GA	GG
630	Crohn's disease	female	43	A3	former		L1	no	B1	no	no	no	no	no	yes	no	no	yes	yes		AA	GG
643	Crohn's disease	male	15	A1	current	no	L3	no	B3	no	yes	yes	yes	no	yes	yes	no	yes	yes		GA
645	Crohn's disease	male	16	A1	current	no	L3	no	B3	yes	yes	yes	yes	no	yes	no	yes	yes	yes	yes	AA	GA
646	Crohn's disease	female	23	A2	current	yes	L1	yes	B3	no	no	no	yes	no	yes	yes	no	yes		no	GG	GA
647	Crohn's disease	male	10	A1	never	yes	L3	no	B3	no	no	yes	yes	yes	yes	yes	no	yes	no	no	AA	GA
650	Crohn's disease	female	15	A1	never	yes	L2	no	B3	yes	yes	yes	yes	no	yes	yes	no	yes	yes	no	GG	GG
651	Crohn's disease	female	14	A1	never	no	L3	no	B1	yes	yes	yes	no	no	yes	yes	no	yes	yes	yes	GA	GA
654	Crohn's disease	male	28	A2	never	no	L1	no	B2	no	no	no	yes	no	yes	no	no	yes	yes	yes	AA	GG
655	Crohn's disease	male	26	A2	current	no	L1	no	B2	no	no	no	yes	no	yes	no	no	no			AA	GA
656	Crohn's disease	female	16	A1	never	no	L3	no	B1	no	no	yes	yes	no	yes	yes	no	yes	yes	yes	GA	AA
658	Crohn's disease	male	27	A2	current	no	L3	no	B1	no	no	yes	no	yes	yes	yes	no	yes	yes	yes	GG	GG
659	Crohn's disease	female	25	A2	current	no	L3	no	B2	no	yes	yes	yes	yes	yes	yes	no	yes	yes	no	GA	GA
660	Crohn's disease	male	48	A3	former	no	L1	yes	B2	no	no	no	yes	no	yes	yes	no	yes	no	no	GA	AA
661	Crohn's disease	female	41	A3	current	no	L1	no	B3	no	no	no	yes	no	yes	yes	no	yes	no		GA	GA
663	Crohn's disease	female	22	A2	current	no	L3	no	B1	no	no	yes	no	no	yes	yes	no	yes	yes		AA	GA
666	Crohn's disease	female	27	A2	never	no	L1	no	B2	no	no	no	yes	yes	yes	yes	no	yes	yes	yes	GG	GA
667	Crohn's disease	male	19	A2	current	no	L1	yes	B3	yes	no	no	yes	no	yes	yes	no	yes	yes	yes	AA	GG
668	Crohn's disease	female	14	A1	never	no	L2	no	B1	no	no	yes	no	no	yes	yes	no	yes	yes	yes	AA	GG
670	Crohn's disease	male	11	A1	never	no	L3	no	B1	no	no	yes	no	no	yes	yes	no	yes	yes	yes	GG	GA
671	Crohn's disease	male	28	A2	never	no	L3	yes	B3	no	no	yes	yes	no	yes	yes	no	yes	yes	yes	AA	GA
672	Crohn's disease	male	23	A2	never	no	L3	no	B2	no	no	yes	yes	no	yes	no	no	yes	no	yes	GA	GG
673	Crohn's disease	female	22	A2	current	no	L1	no	B3	yes	no	yes	no	no	yes	yes	no	yes	yes		GG	AA
674	Crohn's disease	female	27	A2	current	no	L1	no	B3	no	no	no	yes	no	yes	yes	no	yes	yes		AA	GA
675	Crohn's disease	female	11	A1	never	no	L3	no	B2	yes	yes	yes	yes	no	yes	no	no	yes	yes	yes	GG	GA
677	Crohn's disease	male	17	A2	never	yes	L3	yes	B3	no	no	yes	yes	yes	yes	yes	no	yes	yes	yes	AA	GA
679	Crohn's disease	female	16	A1	never	yes	L1	no	B1	no	no	no	no	no	yes	no	no	yes	yes		GA	GG
682	Crohn's disease	male	45	A3	former	no	L3	no	B3	no	yes	yes	yes	no	yes	no	no	no			AA	GG
683	Crohn's disease	female	48	A3	never	yes	L3	no	B1	yes	no	yes	no	no	yes	no	no	no			GG	GG
684	Crohn's disease	female	32	A2	never	no	L1	no	B2	no	no	no	yes	no	yes	no	no	yes	yes		GA	GA
685	Crohn's disease	male	19	A2	never	no	L1	no	B3	no	no	no	yes	no	yes	no	no	yes	yes		GG	GA
686	Crohn's disease	male	26	A2	current	yes	L3	no	B1	no	no	yes	no	no	yes	yes	no	no		no	GG	GA
688	Crohn's disease	female	16	A1	never	no	L3	no	B3	no	yes	yes	yes	no	yes	yes	no	yes	yes		AA	GA
690	Crohn's disease	male	32	A2	never	no	L3	no	B3	yes	yes	yes	yes	no	yes	no	no	yes	yes		GA	GG
692	Crohn's disease	male	46	A3	current	no	L2	no	B1	no	yes	yes	no	no	yes	yes	no	yes	yes	yes	GA	GG
694	Crohn's disease	male	18	A2	never	yes	L2	no	B1	yes	no	yes	yes	no	yes	yes	no	yes	yes	yes	GG	GG
697	Crohn's disease	female	43	A3	former	no	L1	no	B3	no	no	no	yes	no	yes	no	no	no			AA	GG
700	Crohn's disease	female	21	A2	never	no	L1	no	B3	no	no	no	yes	no	yes	no	no	yes	yes		GA	AA
701	Crohn's disease	male	67	A3	current	no	L1	no	B2	no	no	no	yes	no	yes	no	no	no			GG	GG
702	Crohn's disease	male	40	A2	former	no	L1	no	B3	no	no	no	yes	no	yes	yes	no	yes	yes	yes	AA	AA
705	Crohn's disease	female	36	A2	never	no	L1	no	B2	no	no	no	yes	yes	yes	no	no	yes	yes		AA	GG
706	Crohn's disease	female	22	A2	current	yes	L3	no	B1	yes	no	no	no	no	yes	no	no	yes	no	yes	GA	AA
707	Crohn's disease	female	34	A2	former	yes	L2	no	B2	no	no	yes	no	no	yes	no	no	yes	yes	no	GA	GG
709	Crohn's disease	female	21	A2	former	no	L3	no	B1	no	yes	yes	yes	no	yes	yes	no	yes	yes	yes	GG	AA
711	Crohn's disease	male	20	A2	former	no	L2	no			yes	yes	yes	no	yes	yes	no	yes	yes		GA	GG
712	Crohn's disease	female	31	A2	never	no	L3	no	B1	no	no	yes	no	yes	yes	no	no	no			GG	GA
715	Crohn's disease	male	28	A2	former	no	L1	no	B3	no	no	no	yes	no	yes	no	no	yes	yes	no	GA	AA
716	Crohn's disease	male	45	A3	never	no	L2	no	B3	no	yes	yes	yes	yes	yes	yes	no	yes	no		GG	GG
717	Crohn's disease	female	28	A2	never	no	L2	no	B1	no	no	no	no	yes	yes	no	no	no			GA	GG
718	Crohn's disease	female	63	A3	never	yes	L1	no	B1	no	no	no	yes	no	no	no	no	no			AA	GG
719	Crohn's disease	female	26	A2	never	no	L3	no	B1	yes	no	yes	no	no	yes	yes	no	no			GA	GG
721	Crohn's disease	female	36	A2	current	no	L1	no	B3	no	no	no	yes	no	yes	no	no	yes	yes		AA	GG
722	Crohn's disease	male	20	A2	current	no	L1	no	B3	no	no	no	yes	yes	yes	yes	no	yes	yes		GA	GG
725	Crohn's disease	male	20	A2	former	no	L2	no	B1	no	yes	yes	no	no	yes	no	yes	yes	no	yes	AA	GA
726	Crohn's disease	male	21	A2	never		L3	no	B1	no	yes	no		yes							GG	GA
727	Crohn's disease	male	18	A2	former	yes	L1	no	B3	no	no	no	yes	yes	yes	yes	no	yes	yes		AA	GG
730	Crohn's disease	female	21	A2	never	no	L3	no	B1	no	no	yes	yes	yes	yes	no	no	no			GG	AA
733	Crohn's disease	female	23	A2	current	no	L2	no	B1	no	yes	yes	no	yes	yes	yes	no	yes	yes		GA	GA
735	Crohn's disease	male	39	A2	current	no	L1	no	B3	no	no	no	yes	no	yes	no	no	yes	yes		GA	GG
736	Crohn's disease	female	22	A2	current	no	L3	no	B1	yes	no	yes	no	no	yes	yes	no	yes	yes		AA	GA
738	Crohn's disease	female	28	A2	never	no	L3	no	B3	no	no	yes	yes	yes	yes	yes	no	yes	yes		GA	GG
739	Crohn's disease	female	30	A2	never	yes	L3	no	B1	no	no	yes	no	no	yes	yes	no	no		yes	GG	AA
741	Crohn's disease	female	30	A2	former	no	L3	no	B1	yes	no	yes	no	no	no	no	no	no			GA	GA
742	Crohn's disease	male	17	A2	current		L3	no	B1	no	yes	yes	no	no	yes	yes	no	no		yes	GG	GA
743	Crohn's disease	female	26	A2	never	no	L3	no	B3	no	no	yes	yes	yes	yes	yes	no	yes	yes	yes	GA	AA
744	Crohn's disease	female	23	A2	former	yes	L3	no	B1	no	yes	no	no	no	no	no	no	no			AA	GA
746	Crohn's disease	male	29	A2	never		L3	no	B1	no	no	yes	no	yes	yes	no	no	yes	yes		GA	GG
747	Crohn's disease	male	22	A2	never	no	L3	no	B3	no	no	yes	yes	no	yes	yes	no	yes	yes		AA	GA
748	Crohn's disease	female	22	A2	never	no	L2	no	B3	no	yes	yes	yes	yes	yes	no	no	no			GA	GG
749	Crohn's disease	female	48	A3	never	no	L1	no	B3	no	no	no	yes	yes	yes	no	no	no			GA	GA
750	Crohn's disease	female	49	A3	never	no	L1	no	B2	no	no	no	yes	no	yes	no	no	yes	yes		GA	GG
751	Crohn's disease	female	35	A2	never	no	L1	no	B3	no	no	no	no	no	yes	no	no	yes	yes		GA	GG
753	Crohn's disease	male	21	A2	former		L1	no	B3	no	no	no	yes	yes	yes	yes	no	yes	yes		GA	GA
756	Crohn's disease	male	40	A2	never	no	L1	no	B3	no	no	no	yes	no	yes	no	no	yes	yes		GA	GA
758	Crohn's disease	male	13	A1	never	yes	L3	no	B1	no	no	yes	no	no	yes	no	no	no			GA	GG
759	Crohn's disease	female	17	A2	never	no	L2	no	B1	no	yes	yes	no	no	yes	yes	no	yes	yes	no	GA	GA
760	Crohn's disease	female	22	A2	current	yes	L3	yes	B1	no	no	yes	no	no	yes	no	no	yes	no	yes	GA	GA
762	Crohn's disease	female	29	A2	current	no	L1	no	B3	no	no	no	yes	yes	yes	no	no	yes	yes		GA	GA
765	Crohn's disease	female	36	A2	never	no	L2	no	B1	no	no	yes	no	no	yes	yes	no	yes	yes	yes	GA	GG
766	Crohn's disease	female	15	A1	never	no	L3	no	B3	no	no	yes	yes	no	yes	yes	no	yes	yes		AA	GA
767	Crohn's disease	male	19	A2	never	no	L1	no	B2	no	no	no	no	no	yes	yes	no	yes	no	yes	AA	GA
768	Crohn's disease	female	25	A2	never	no	L1	no	B2	no	no	no	yes	yes	yes	yes	no	yes	yes	no	GA	AA
771	Crohn's disease	female	26	A2	current	no	L3	no	B3	no	yes	yes	yes	no	yes	yes	no	yes	yes	yes	AA	GG
774	Crohn's disease	male	19	A2	former	no	L3	no	B1	no	yes	yes	no	no	yes	no	no	yes			AA	GG
775	Crohn's disease	female	25	A2	never	no	L3	no	B3	no	yes	yes	no	yes	yes	yes	no	yes	yes		GG	GG
776	Crohn's disease	female	50	A3	never	no	L3	no	B3	no	yes	yes	yes	no	yes	yes	yes	no			GG	GA
780	Crohn's disease	male	15	A1	never	no	L2	no	B3	no	yes	yes	yes	yes	yes	yes	no	yes	yes		GA	AA
781	Crohn's disease	male	25	A2	former	no	L3	no	B1	no	no	yes	no	no	no	no	no	yes	yes		AA	GA
783	Crohn's disease	female	35	A2	never	no	L3	no	B1	no	yes	yes	no	no	yes	no	no	yes	yes		GG	AA
785	Crohn's disease	male	24	A2	current	no	L1	no	B2	no	no	no	no	yes	yes	yes	no	yes	yes		AA	GA
786	Crohn's disease	female	13	A1	never	no	L1	no	B3	no	no	no	yes	yes	no	no	no	no			GA	GG
787	Crohn's disease	female	43	A3	never	no	L3	no	B1	no	yes	yes	yes	no	yes	yes	no	yes	yes		GA	GG
788	Crohn's disease	female	24	A2	never	no	L1		B1	no	no	no	no	no	yes	no	no	no			GA	GA
789	Crohn's disease	female	26	A2	never	no	L1	no	B3	no	no	no	yes	yes	yes	yes	no	yes	yes		GA	GG
790	Crohn's disease	female	41	A3	former	yes	L1	yes	B1	no	no	no	yes	no	yes	no	no	yes	yes		GA	GA
791	Crohn's disease	female	27	A2	current	no	L3	yes	B1	no	yes	yes	no	no	yes	yes	no	yes	yes		GA	GA
793	Crohn's disease	female	36	A2	current	yes	L3	no	B1	no	no	yes	no	yes	yes	yes	no	yes	no	yes	AA	GA
795	Crohn's disease	female	22	A2		no	L1	no	B2	no	no	no	yes	yes	yes	no	no				GA	GG
796	Crohn's disease	male	21	A2	former	no	L3	no	B2	no	no	yes	yes	no	yes	yes	no		yes		GA	GA
797	Crohn's disease	male	19	A2	former	no	L3	yes	B2	yes	yes	yes	yes	yes	yes	no	no		yes	yes	GA	GA
798	Crohn's disease	female	15	A1	never	no	L2	no	B1	yes	yes	yes	yes	yes	yes		yes		no	no	AA	GA
799	Crohn's disease	male	28	A2	never	no	L3	no	B3	yes	no	yes	yes	yes	yes	no	no		yes		GG	GA
800	Crohn's disease	male	35	A2	never	no	L2	no	B1	yes	yes	yes	no	no	yes	no	no				AA	GG
801	Crohn's disease	male	40	A2	never	no	L3	no	B2	no	no	yes	yes	yes	yes	yes	no		yes		GA	AA
802	Crohn's disease	male	25	A2	former	no	L1	yes	B2	no	no	no	yes	no	yes	yes	no			yes	GG	GA
803	Crohn's disease	female	13	A1	never	yes	L2	no	B1	no	yes	yes	no	no	yes	yes	no		no	yes	GA	GA
804	Crohn's disease	male	20	A2		no	L3	no	B2	yes	yes	yes	yes	yes	yes	yes	no		yes	yes	GA	GG
806	Crohn's disease	male	38	A2	never	no	L3	no	B3	no	yes	yes	yes	no	yes	no	no		yes		GA	AA
807	Crohn's disease	female	29	A2	never	no	L1	yes	B3	no	no	no	yes	no	yes	yes	no		yes		AA	GA
808	Crohn's disease	male	15	A1	former	no	L3	no	B3	no	no	yes	yes	yes	yes	yes	no				GA	GG
809	Crohn's disease	female	22	A2	never	no	L1	no	B3	no	no	no	yes	no	yes	no	no		no	no	GA	AA
810	Crohn's disease	male	25	A2	current	no		yes	B3	no	no	no	yes	no	no				no	yes	GA	AA
812	Crohn's disease	male	30	A2	current	no	L1	no	B2	no	no	no	yes	no	yes	yes	no		no	yes	AA	AA
813	Crohn's disease	male	49	A3	never	no	L1	no	B3	no	no	no	yes	no	yes	no	no				GA	AA
814	Crohn's disease	female	23	A2	never	no	L2	no	B1	no	yes	yes	no	no	yes	yes	no		yes		GA	AA
815	Crohn's disease	male	23	A2	current	no	L3	no	B1	no	yes	yes	no	no	yes	no	no		yes	yes	GG	AA
816	Crohn's disease	female	35	A2	never	no	L1	no	B2	no	no	no	yes	yes	yes	yes	no		yes		GG	AA
817	Crohn's disease	female	43	A3	never	no	L2	no	B1	no	no	yes	yes	yes	yes	yes	no				GA	GG
818	Crohn's disease	male	42	A3	former	no	L3	no	B1	yes	no	yes	no	no	yes	yes	no			yes	GG	GG
819	Crohn's disease	male	25	A2	former	no	L1	no	B2	no	no	no	yes	yes	yes	no	no				GA	GA
820	Crohn's disease	female	10	A1	never	no	L3	no	B1	no	yes	yes	no	no	yes	no	no		yes		GA	GG

## Sheet: Controls
participant number	status	sex	age	rs4880	rs1050450
1001	control	male	14	GA	GG
1002	control	male	14	GA	GG
1006	control	female	14	GG	GA
1008	control	female	12	GG	GG
1009	control	male	12	AA	AA
1012	control	female	15	GG	GA
1015	control	male	14	GG	GG
1016	control	male	10	GA	GG
1021	control	female	10	GG	GA
1032	control	female	14	GA	AA
1048	control	female	14	GA	GA
1062	control	female	15	GA	GA
1069	control	female	11	GA	GA
1072	control	male	11	GA	GG
1088	control	female	15	GA
1191	control	female	15	GA	GG
1218	control	female	20	AA	GA
1286	control	male	17	AA	GA
1287	control	female	17	GG	GG
1295	control	male	17	GA	GA
1302	control	male	15	GA	AA
1303	control	female	19	AA	GG
1304	control	male	19	GA	GA
1307	control	female	20	GG	GG
1308	control	female	20	GA	GA
1309	control	male	19	GA	AA
1312	control	male	15	AA	GG
1315	control	male	15	AA	GA
1324	control	male	15	GA	GA
1328	control	female	17	AA	AA
1337	control	male	18	GA	GG
1346	control	female	18	GA	GG
1347	control	male	18	GA	GG
1355	control	female	20	GA	GG
1356	control	female	20	GA	GA
1357	control	female	18	AA	GA
1358	control	male	18	GG	GA
1388	control	female	18	AA
1409	control	female	19	AA	GA
1536	control	female	20	GA	GA
1555	control	female	20	GA	GG
1586	control	male	21	AA	AA
1587	control	female	20	GA	GG
4022	control	female	22		AA
4049	control	male	36	GA	GA
4064	control	male	36	GG	GG
4074	control	male	40	GG	GG
4075	control	female	61	GG
4077	control	female	44	AA	GA
4080	control	male	30	GG	AA
4084	control	male	25	AA	GA
4100	control	male	65	GG	GA
4110	control	female	30	GG	GA
4158	control	female	68		GG
4165	control	male	33	AA	GG
4169	control	male	22	GA	AA
4172	control	female	80	GG	GA
4179	control	male	74	AA	GG
4181	control	female	47	GG	GG
4183	control	female	51	GG	GA
4185	control	female	47	GA	GG
4186	control	female	65	GA	GG
4187	control	male	75	GA	AA
4188	control	male	58	GA	AA
4189	control	male	65	GA	GA
4192	control	female	47	GG	GA
4195	control	female	75	AA	GA
4196	control	female	50	GA	GG
4197	control	male	22	GG	GG
4198	control	female	54	GA	AA
4200	control	female	78	GG	GG
4202	control	female	68	GA	GA
4205	control	male	71	GG	GG
4206	control	female	51	AA	AA
4213	control	female	26	AA	GG
4214	control	female	52	AA	GA
4216	control	female	67	GA	GA
4217	control	male	78	AA	GG
4218	control	female	22	GG	GA
4220	control	female	46	AA	GG
4225	control	male	79	GA	AA
4229	control	female	33	GG	GA
4234	control	female	37	GA	GA
4235	control	male	40	GG	GG
4236	control	female	39	GA	GA
4237	control	female	41	GA	GA
4238	control	female	64	GG	GG
4240	control	female	52	GA	GG
4243	control	female	51	GA	GG
4245	control	male	69	GA	GG
4246	control	female	79		AA
4247	control	female	79	GA	AA
4252	control	female	63	GG	GG
4253	control	male	43	GA	GA
4255	control	female	68	GA	AA
4256	control	female	47	GA	GG
4257	control	female	73	GA	GG
4258	control	female	38	AA	GG
4261	control	female	63	GG	GA
4263	control	male	32	GG	GA
4268	control	female	70	GG	GG
4273	control	female	21	GA	GG
4275	control	male	56	GG	GA
4276	control	male	65	GA	GA
4279	control	female	54	GG	GA
4280	control	female	19	GA	GG
4281	control	male	42	GA	GG
4283	control	female	37	GA	GG
4285	control	female	50	AA	GA
4286	control	female	40	GG	GG
4288	control	female	63	AA	GG
4290	control	female	50	AA	GA
4291	control	female	73	GA	GA
4292	control	male	77	GA	GG
4293	control	female	26	GA	GG
4294	control	female	47	AA	GG
4295	control	male	60	GA	GA
4298	control	male	33	AA	GG
4301	control	female	76	AA	GG
4302	control	male	66	GA	GA
4303	control	female	75	GA	GG
4305	control	male	69	GA	GG
4309	control	male	68	GG	GA
4310	control	female	47	GA	GA
4313	control	male	78	GA	GG
4314	control	male	83	GG	GA
4317	control	female	54	GA	GG
4318	control	female	70	GA	GG
4319	control	female	29	GG	GG
4320	control	female	47	GA	GG
4322	control	male	60	AA	GG
4327	control	female	61	GA	GA
4332	control	female	59	AA	GA
4333	control	female	51	GA	GG
4337	control	female	51	GA	GG
4339	control	male	19	GA	GG
4341	control	male	33	AA	GG
4342	control	female	67	GG	GG
4345	control	female	22	AA	GA
4347	control	male	26	AA	GA
4354	control	male	41	GA	GG
4360	control	male	81	AA	GG
4361	control	male	35	GA	GA
4365	control	female	57	GG	GG
4370	control	male	69	AA	GG
4374	control	female	28	GA	GA
4377	control	female	45	GA	GA
4378	control	female	73	GA	GA
4382	control	female	39	GG	GA
4386	control	female	24	AA	GA
4389	control	female	36	GG	GG
4396	control	female	45	GG	AA
4397	control	female	62	AA	GG
4399	control	female	82	GA	GG
4400	control	male	21	GG	GG
4406	control	female	57	AA	GA
4442	control	female	54	GG	GG
4463	control	female	64	GA	GA
4464	control	female	20	AA	GA
4469	control	female	56	AA	GG
4502	control	female	32	AA	GG
4504	control	male	68	GA	GG
4507	control	male	45		AA
4510	control	male	37	GA	GG
4520	control	female	64	GA	GA
4524	control	female	72	GG	GA
4526	control	male	74	AA	AA
4531	control	female	58	GA	GA
4547	control	female	40	GG	GA
4551	control	female	44	AA	GA
4552	control	male	18	GA	GG
4557	control	male	20	GA	GG
4562	control	female	34	GA	GA
4619	control	female	73		GG
4624	control	female	76	AA	GG
4635	control	male	53	AA	GG
4682	control	male	53	GA	GA
4736	control	female	65	GA	GA
4746	control	male	75	GA	GG
4752	control	female	53	GA	GG
4763	control	female	65	GA	GG
4769	control	female	78	GA	GG
4816	control	female	61	GA	GG
4819	control	female	51	AA	GG
4840	control	female	77	GG	GA
4882	control	female	49	GA	GA
4888	control	female	51	GG	GA
4916	control	female	60	GA	GA
8165	control	male	64	AA	GA
8166	control	male	79	GA	GA
8167	control	male	88	AA	AA
8168	control	male	69	GA	AA
8169	control	male	62	AA	GG
8171	control	male	71	GA	GA
8172	control	male	63	GG	GG
8174	control	male	58	GA	GA
8176	control	male	58	GG	GG
8179	control	male	57	GG	GG
8181	control	male	66	GA	AA
8184	control	male	60	GA	GA
8188	control	male	55	GG	GA
8189	control	male	48	GG	GA
8194	control	male	82		GG
8196	control	male	56		GG
8199	control	male	55	GA	GG
8200	control	male	48	AA	GA
8211	control	male	67	GG	GG
8213	control	male	46	GA
8214	control	male	50	GA	AA
8216	control	male	78	GA	GA
8220	control	male	71	GA	GG
8225	control	male	54	GA	AA
8226	control	male	47	GG	GG
8227	control	male	54	GA	GA
8228	control	male	81	GG	GG
8230	control	male	58	GA	GG
8233	control	male	52	GA	GG
8239	control	male	56	GA	GA
8243	control	male	78	GA	GG
8512	control	female	42	GA	GA
8514	control	male	42	GG	GG
8515	control	female	26	GA	GG
8516	control	female	46	GA	GG
8517	control	female	23	GA	GA
8519	control	female	38	AA	GG
8520	control	female	41	AA	GA
8521	control	female	52	GA	GG
8523	control	female	49	AA	GG
8524	control	female	83	GA	GA
8525	control	female	57		GA
8526	control	male	36	GG	GA
8529	control	female	62	GG	GA
8530	control	male	29	GA	GA
8531	control	female	44	GA	GA
8532	control	female	78	GG	GA
8533	control	female	32	GA	GG
8534	control	male	33	GG	GA
8535	control	female	39	AA	GG
8536	control	female	76	AA	GG
8537	control	female	31	GG	GA
8538	control	female	56	AA	GG
8539	control	male	71	GG	AA
8540	control	female	56	GG	GG
8541	control	male	36	GA	GG
8542	control	female	69	AA	GA
8543	control	female	60	GA	GA
8544	control	female	60	GA	GG
8545	control	female	42	GA	GA
8546	control	male	82	GA	GA
8547	control	female	39	AA	AA
8548	control	female	56	GG	GA
8549	control	female	59	GA	GG
8550	control	female	23	GG	GG
8552	control	male	61	GA	GA
8553	control	male	36	AA	GA
8556	control	male	42	GA	AA
8557	control	male	30	GG	GG
8558	control	female	75	AA	AA
8559	control	male	42	AA	GG
8560	control	female	57	GG	GA
8562	control	male	30	GA	GA
8563	control	female	51	GA	GG
8564	control	female	78	GA	GG
8565	control	female	36	AA	AA
8566	control	male	73	AA	GA
8567	control	female	34	GG	GA
8568	control	female	71	GG	GA
8569	control	female	37	GA	GG
8570	control	female	60	AA	GA
8571	control	female	46	GA
8572	control	male	41	AA	GG
8573	control	female	47	GG	AA
8574	control	female	52	GG	GG
8575	control	female	43	GA	GA
8577	control	female	37	GG	AA
8578	control	female	54	AA	GG
8579	control	female	41	AA	GG
8580	control	male	63	GA	GG
8581	control	female	28	AA	GA
8582	control	female	26	GG	GG
8583	control	female	70	AA	GG
8585	control	female	40	GA	GA
8586	control	male	73	GA	GG
8587	control	male	58	GA	GA
8588	control	male	39	AA	GA
8589	control	female	33	GG	GA
8590	control	female	43	GA	GA
8591	control	male	40	GG	AA
8592	control	female	64	GG	GA
8593	control	male	74	GA	GG
8594	control	male	44	AA	GG
8595	control	male	37	GA	GG
8596	control	male	65	AA	GA
8600	control	male	28	AA	GA
8601	control	male	38	GA	GA
8607	control	male	44	GA	GG
8608	control	male	56	GA	GA
8609	control	male	61	AA	GG
8611	control	male	37	AA	GA
8612	control	male	53	GA	GG
8616	control	male	53	GG	GA
8617	control	male	56	GA	GG
8621	control	male	44	AA	GA
8627	control	male	61	AA	GA
8629	control	male	61	GG	GA
8631	control	male	68	AA	GG
8632	control	male	61	AA	GG
8634	control	male	87	GA	GG
8637	control	male	76	GA	GA
8638	control	male	55	GA	GG
8640	control	male	50	GA	GG
8644	control	male	46	GG	GG
8645	control	male	70	GA	GA
8646	control	male	53	AA	GG
8649	control	male	41	AA	GG
8651	control	male	48	AA	GG
8652	control	male	64	AA	GA
8653	control	male	48	GA	GA
8656	control	male	33	AA	GG
8661	control	female	20	AA	GG
8662	control	female	20	GA	GA
8664	control	female	21	GA	GG
8666	control	female	22	GA	GG
8667	control	female	22	GA	GA
8668	control	female	22	GG	GG
8670	control	female	23	GA	GG
8671	control	male	24	GA	GA
8672	control	female	25	AA	GG
8673	control	female	25	AA	GG
8674	control	female	26	GA	GA
8675	control	female	27	GA	GG
8676	control	female	27	AA	GG
8677	control	female	27	GA	AA
8678	control	male	28	GG	GA
8679	control	female	28	GG	GG
8680	control	male	29	GG	GA
8681	control	female	29	GG	GG
8682	control	female	30	GA	GG
8683	control	female	30	GA	GG
8684	control	female	30	AA	GG
8685	control	female	31	GA	GG
8686	control	female	31	GA	GG
8687	control	female	32	GG	GG
8688	control	female	33	AA	GA
8689	control	female	33	GA	GA
8690	control	female	33	GA	GA
8691	control	male	34	GA	GG
8692	control	male	34	GA	GA
8693	control	female	34	GA	GA
8694	control	female	35	GA	GA
8695	control	female	35	GA	GG
8696	control	female	36	GA	GA
8697	control	female	37	GG	GA
8698	control	female	37	AA	GG
8699	control	male	38	AA	GG
8700	control	male	39	GG	GA
8701	control	male	39	GG	GG
8702	control	female	39	AA	GA
8703	control	female	39	AA	GA
8704	control	male	40	GA	GG
8705	control	female	40	AA	GG
8706	control	male	41	GA	GG
8707	control	male	41	GA	GA
8708	control	male	41	GG	GA
8709	control	female	41	GG	GG
8710	control	female	42	GA	GG
8711	control	female	42	GA	GG
8712	control	female	42	GA	GG
8713	control	female	43	GA	AA
8714	control	female	43	AA	GG
8715	control	male	44	GG	AA
8716	control	male	44	AA	GA
8717	control	male	44	GG	GA
8718	control	female	44	GA	GG
8719	control	female	44	GA	GG
8720	control	female	44	AA	GA
8721	control	female	44	GG	GG
8722	control	female	44	AA	GA
8723	control	male	45	GA	GG
8724	control	male	45	GA	GA
8725	control	male	45	GA	GG
8726	control	female	45	GA	GA
8727	control	female	45	AA	GA
8728	control	male	46	GA
8729	control	male	46	AA	GA
8730	control	female	46	GA	GG
8731	control	female	46	GG	AA
8732	control	female	47	AA	GA
8733	control	female	47	AA	GA
8734	control	female	47	AA	GG
8735	control	male	48	AA	GA
8736	control	male	48	AA	GA
8737	control	female	48	GG	GA
8739	control	male	49	GA	GA
8740	control	female	49	GG	GA
8741	control	male	50	AA	GA
8742	control	female	50	AA	GA
8743	control	female	50	AA	GA
8744	control	male	51	GG	GA
8745	control	female	51	GA	GA
8746	control	male	52	GG	GA
8747	control	male	52	GA	GA
8748	control	female	53	GA	GA
8749	control	male	55	GG	GA
8750	control	male	56	AA	GG
8751	control	female	56	GG	GG
8752	control	female	56	AA	GG
8753	control	female	57	GG	GA
8754	control	male	57	GG	GA
8755	control	female	58	GG	GA
8756	control	female	58	GG	GA
8757	control	female	59	GG	GA
8758	control	female	59	AA	GG
8759	control	female	60	GA	GG
8760	control	male	61	GA	GG
8761	control	female	61	GG	GG
8762	control	male	61	GG	GA
8763	control	male	64	GG	GG
8764	control	female	66	AA	GA
8765	control	female	66	GA	GG
8766	control	female	67	AA	AA
8767	control	male	67	GA	AA
8768	control	female	68	AA	GG
8769	control	female	69	GA	AA
8770	control	female	70	AA	GA
8771	control	female	71	AA	GA
8772	control	female	72	GA	GG
8773	control	female	73	GG	AA
8774	control	female	73	GA	GG
8775	control	female	74	GA	GG
8776	control	female	74	AA	GA
8777	control	male	76	GG	GA
8778	control	female	76	GA	AA
8779	control	male	81	AA	GA
